1           A natural variation-based screen in mouse cells reveals USF2 as a  
2           regulator of the DNA damage response and cellular senescence

3  
4           Taekyu Kang<sup>1,2</sup>, Emily C. Moore<sup>3</sup>, Emily E. K. Kopania<sup>3</sup>, Christina D. King<sup>1</sup>, Birgit  
5           Schilling<sup>1</sup>, Judith Campisi<sup>1</sup>, Jeffrey M. Good<sup>3</sup>, and Rachel B. Brem<sup>1,2\*</sup>

6  
7           <sup>1</sup>Buck Institute for Research on Aging, Novato, CA; <sup>2</sup>Department of Plant and Microbial Biology,  
8           UC Berkeley, Berkeley, CA; <sup>3</sup>Division of Biological Sciences, University of Montana, Missoula,  
9           MT

10                           \*Correspondence: rbrem@berkeley.edu

11                           Novel screen reveals USF2 as senescence regulator

12           Keywords: Natural variation, novel screen, USF2, DNA damage, cellular senescence

13  
14

## 15 Abstract

16  
17 Cellular senescence is a program of cell cycle arrest, apoptosis resistance, and cytokine release  
18 induced by stress exposure in metazoan cells. Landmark studies in laboratory mice have  
19 characterized a number of master senescence regulators, including p16<sup>INK4a</sup>, p21, NF-κB, p53,  
20 and C/EBPβ. To discover other molecular players in senescence, we developed a screening  
21 approach to harness the evolutionary divergence between mouse species. We found that  
22 primary cells from the Mediterranean mouse *Mus spretus*, when treated with DNA damage to  
23 induce senescence, produced less cytokine and had less-active lysosomes than cells from  
24 laboratory *M. musculus*. We used allele-specific expression profiling to catalog senescence-  
25 dependent *cis*-regulatory variation between the species at thousands of genes. We then tested  
26 for correlation between these expression changes and interspecies sequence variants in the  
27 binding sites of transcription factors. Among the emergent candidate senescence regulators, we  
28 chose a little-studied cell cycle factor, USF2, for molecular validation. In acute irradiation  
29 experiments, cells lacking USF2 had compromised DNA damage repair and response. Longer-  
30 term senescent cultures without USF2 mounted an exaggerated senescence regulatory  
31 program—shutting down cell cycle and DNA repair pathways, and turning up cytokine  
32 expression, more avidly than wild-type. We interpret these findings under a model of pro-repair,  
33 anti-senescence regulatory function by USF2. Our study affords new insights into the  
34 mechanisms by which cells commit to senescence, and serves as a validated proof of concept  
35 for natural variation-based regulator screens.

## 37 Introduction

38  
39 Metazoan cells of many types, upon exposure to stress, can enter a senescence program, in  
40 which they stop dividing, become refractory to apoptosis, and release soluble inflammation and  
41 tissue remodeling factors termed the senescence-associated secretory phenotype (SASP) (1–  
42 4). The resulting acute immune response can clear debris, promote wound healing, and/or  
43 suppress tumorigenesis (5–8). However, during aging, senescent cells can remain long past  
44 any initial triggering event, resulting in chronic inflammation that damages the surrounding  
45 tissue (5,9–12). Landmark work has revealed the benefits of eliminating senescent cells to treat  
46 age-related pathologies and boost median lifespan (7,8,13,14).

47  
48 Establishment of the senescent state and the activity of senescent cells hinge in large part on  
49 gene regulatory events. Finding molecular players that control this process is an active area of  
50 research. Now-classic work has implicated p16<sup>INK4a</sup> and p21 in the repression of pro-cell cycle  
51 genes and promotion of growth arrest (15) after DNA damage, and NF-κB, p53, and C/EBPβ as  
52 regulators of the SASP (16). However, given the complexity of the senescence program, many  
53 more regulators likely remain to be identified. Indeed, bioinformatic approaches have identified  
54 dozens of other transcription factor candidates in senescence (17–24), many of which remain  
55 unvalidated (but see (18–21) for recent discoveries of the roles of DLX2, FOXO3 and AP-1).

56  
57 We set out to develop a novel approach to survey transcription factors that play a role in cellular  
58 senescence, with the potential for increased specificity relative to traditional genomic screens.  
59 Our strategy took advantage of the natural genetic variation in senescence gene expression,  
60 and transcription factor binding sites, across mouse species. Among the top hits from this  
61 analysis, we chose the under-studied factor USF2 for validation experiments, focusing on gene  
62 regulation and cellular phenotypes during senescence induction and maintenance.

## 64 Methods

65  
66  
67  
68  
69  
70  
71  
72  
73  
74  
75  
76  
77  
78  
79  
80  
81  
82  
83  
84  
85  
86  
87  
88  
89  
90  
91  
92  
93  
94  
95  
96  
97  
98  
99  
100  
101  
102  
103  
104  
105  
106  
107  
108  
109  
110  
111  
112  
113

## Primary cell extraction and culture

Wild-derived lines of *Mus musculus* (PWK/PhJ), *Mus spretus* (STF/Pas), and their interspecies F1 hybrids (*M. musculus* x *M. spretus*), were maintained in standard conditions under Montana Institutional Animal Care and Use Committee protocol number 062-1JGDBS-120418. For each genotype, five tails from two males and three females aged 3 to 5 months were collected into chilled Dulbecco's Modified Eagle Medium (DMEM) and shipped to the Buck Institute/UC Berkeley for further processing. *M. domesticus* TUCA, from Tucson, Arizona, in their 40th generation of sib-sib mating, and MANB, from Manaus, Brazil, in their 25th generation of sib-sib mating, were maintained in standard conditions under UC Berkeley Institutional Animal Care and Use Committee protocol number AUP-2016-03-8548-2. For each genotype, two tails from female mice less than 10 weeks old were collected as above. No blinding was required for tail collection. Primary tail fibroblasts were extracted from the cuttings essentially as described (25). For experiments in wild-type *M. musculus*, *M. spretus*, *M. domesticus*, and F1 hybrid cells we considered the culture from each individual animal to represent one biological replicate of the respective genotype.

## Irradiation treatment

To treat a given cell culture replicate with ionizing radiation (3,26,27) for a cell-biological assay or omics profiling, we proceeded as follows. The day before irradiation, cells were seeded at 60-70% confluency and incubated in a 37°C humidified incubator at 3% O<sub>2</sub> and 10% CO<sub>2</sub> overnight in complete medium. The next day, a subset of cells was collected and used as input into the respective experiment as the unirradiated control. The remainder of the culture was transferred into an X-RAD 320 X-Ray Biological Irradiator and treated with 15 Gy of X-ray irradiation. Cultures were then placed back into the 37°C humidified incubator at 3% O<sub>2</sub> and 10% CO<sub>2</sub> until sampling at 6 hours for marker assays and RNA-seq focused on acute DNA damage response, or 7, 10 or 20 days for marker assays and RNA-seq and proteomics focused on senescence (in which case the medium was replaced 6-8 hours after irradiation, then every 48 hours for the remainder of the experiment), as detailed below.

## Senescence marker assays

For a given replicate culture after irradiation and incubation (see above), senescence-associated  $\beta$ -galactosidase activity was measured using the BioVision Inc. Senescence Detection Kit (cat. #K320): cells were fixed, permeabilized, and incubated with the staining solution containing X-gal overnight. Multiple images were taken the following day using a brightfield microscope, and the image names were randomized before the proportion of  $\beta$ -galactosidase-positive cells was counted manually to remove potential sources of bias. Cultures were considered to be senescent if they showed less than 10% EdU incorporation (see below) and over 90%  $\beta$ -galactosidase-positive cells. In the species comparison of Figure 1 we subjected two technical replicate cultures of each of three biological replicates per purebred species to irradiation (see above) followed by  $\beta$ -galactosidase assays at the indicated timepoints. In Figure 6C, we carried out irradiation and  $\beta$ -galactosidase assays as above at day 7 after irradiation for two technical replicates from each of two biological replicates of *M. musculus* cells infected with lentivirus harboring the scrambled control and two of each *Usf2* knockdown (see below). In Supplemental Figure S1, data from each purebred cell lines were collected on day 10 following irradiation. In Supplemental Figure S4, data for purebreds were

114 from Figure 2 at day 7; separately, for the interspecies F1 hybrid, we carried out irradiation and  
115  $\beta$ -galactosidase assays as above for two technical replicates from one biological replicate.

116

### 117 **RNA collection and sequencing**

118

119 For a given replicate culture of a given genotype, either before irradiation or 6 hours, 10 days, or  
120 20 days after irradiation (see above), cells were treated with TRIzol™ and RNA was extracted  
121 using chloroform and ethanol precipitation. The RNA was then further purified using the Qiagen  
122 RNeasy Kit (cat. #74004) for DNase treatment and column cleanup. The purity of the extracted  
123 RNA was verified using a NanoDrop ND-1000 Spectrophotometer; all samples had 260/280 and  
124 260/230 ratios greater than 2.0. Purified RNA in distilled RNase/DNase free water was snap  
125 frozen using dry ice and stored at -80°C. Samples were then either transferred to the QB3  
126 Genomics core at University of California, Berkeley for library prep and sequencing on 150PE  
127 NovaSeq S4 or shipped to Novogene Co. (Sacramento, CA) for the same. Both facilities  
128 provided 25 million paired end reads per sample. For expression profiles of purebred cells and  
129 *M. musculus* x *M. spretus* F1 hybrid cells, we subjected three biological replicates of a given  
130 genotype to irradiation (see above) followed by RNA-seq at the indicated timepoints. To assess  
131 transcriptional impacts of *Usf2* knockdown we carried out irradiation and RNA isolation as above  
132 for two biological replicates of *M. musculus* cells infected with lentivirus harboring the scrambled  
133 control and two of each *Usf2* knockdown (see below).

134

### 135 **Pseudogenome and VCF generation**

136

137 As publicly available annotations for *M. musculus* and *M. spretus* are in the context of their  
138 reference genomes (GRCm38.96 and SPRET\_EiJ\_v1.96 respectively), custom  
139 pseudogenomes for strains PWK and STF were generated and used for this study. For the  
140 PWK pseudogenome, variant calls between PWK and the reference genome in the form of a  
141 variant call file (VCF) were downloaded from the Sanger Mouse Genomes Project database  
142 (<https://www.sanger.ac.uk/data/mouse-genomes-project/>). A pseudogenome using the VCF and  
143 the GRCm38.96 reference genome was created using bcftools v1.9 (28). To generate shotgun  
144 sequence data for the STF pseudogenome, DNA was extracted from *M. spretus* liver tissue  
145 using Qiagen DNeasy spin columns (cat. #69506). The sample was sheared via sonication  
146 (Covaris E220), and prepared using the New England Biolabs NEBNext Ultra DNA Library kit  
147 (cat. #E7370L). The final library was sequenced on a single lane of 150bp PE Illumina HiSeq X  
148 at Novogene, Inc. The latter reads were aligned to the SPRET\_EiJ\_v1.96 reference genome  
149 using bowtie v2.2.3 (29), and a VCF was generated using bcftools mpileup and filtered for  
150 quality, depth, and SNPs using vcftools (30,31). The VCF was then used with the reference  
151 genome to create a STF pseudogenome using bcftools. The pseudogenomes were verified by  
152 identifying a number of called variants by hand. A VCF of variants between the STF and PWK  
153 pseudogenomes was generated as above aligning the STF whole genome sequencing reads to  
154 the PWK pseudogenome.

155

### 156 **RNA-seq processing**

157

158 In transcriptional profiles of *M. musculus* x *M. spretus* F1 hybrid cells, sequencing reads from a  
159 given replicate were aligned to a concatenated PWK/STF pseudogenome using tophat v2.1.1  
160 (32) allowing for zero mismatches to ensure allele specific mapping. Alignments were then  
161 filtered for uniquely mapped reads using samtools v1.3.1, and gene counts were generated  
162 using HTSeq v0.11.2 (33) and genome annotations (GRCm38.96, SPRET\_EiJ\_v1.96) for both  
163 species from Ensembl. Counts were then converted to transcripts per million (TPM) using

164 custom R scripts, and genes were filtered for those showing counts in more than half the  
165 samples sequenced.

166  
167 In transcriptional profiles of purebred *M. musculus* wild-type cells and *M. musculus* cells infected  
168 with lentiviruses harboring shRNAs, RNA-seq processing was as above but mapping was to the  
169 PWK pseudogenome only; for profiles of purebred *M. spretus* wild-type cells, mapping was to  
170 the STF pseudogenome only.

171  
172 Data for the average TPM across biological replicates for purebred parents and interspecific F1  
173 hybrid are reported in Supplemental Table S1. Average TPM across biological replicates for  
174 shRNA-treated *M. musculus* cells are reported in Supplemental Table S6.

### 175 176 **Gene Ontology enrichment analysis of RNA-seq data**

177  
178 For the comparison of transcriptional profiles of *M. musculus* and *M. spretus* purebred cells, for  
179 each gene in turn we tabulated the average TPM count from each species across replicates,  
180 and then took the  $\log_2$  of the ratio of these averages,  $r_{\text{sen,true}}$ . We downloaded Gene Ontology  
181 annotations from the AmiGO 2 (34,35) database and filtered for those with supporting biological  
182 data. For each term, we summed the  $r_{\text{sen,true}}$  values across all genes of the term, yielding  $s_{\text{sen,true}}$ .  
183 To assess the enrichment for high or low values of this sum, we first took the absolute value,  
184  $|s_{\text{sen,true}}|$ . We then sampled, from the total set of genes with expression data, a random set of the  
185 same number as that in the true data for the term; we calculated the species difference  $r_{\text{sen,rand}}$   
186 for each such gene and the absolute value of the sum over them all,  $|s_{\text{sen,rand}}|$ . We used as a  $p$ -  
187 value the proportion of 10,000 resampled data sets in which  $|s_{\text{sen,true}}| > |s_{\text{sen,rand}}|$ .

188  
189 For analysis of the impact of *Usf2* knockdown on expression before or 6 hours, 10 days, or 20  
190 days after irradiation (see below), Gene Ontology enrichment tests were as above except that  
191 we took the ratio, for a given gene, between the average expression in purebred *M. musculus*  
192 (PWK) cells infected with lentivirus harboring scrambled shRNA and the analogous quantity  
193 across both *Usf2*-targeting shRNA treatments.

### 194 195 **Proteomic analysis of secreted proteins**

196  
197 For a given replicate culture, either before irradiation or 10 days after irradiation (see above),  
198 cells were washed three times with PBS and incubated with serum and phenol red free DMEM  
199 containing 1% pen-strep for 24 hours. The following day the conditioned medium was collected  
200 and passed through a 0.45  $\mu\text{m}$  filter to remove cellular debris. The conditioned medium was  
201 placed in a  $-80^\circ\text{C}$  freezer for storage before use as input into proteomic profiling (see below).  
202 For proteomic profiles of purebred cells, we carried out this procedure for three technical  
203 replicate cultures of one biological replicate per species.

204  
205 Sample processing for quantitative proteomic analysis via mass spectrometry was performed as  
206 described in (36).

### 207 208 **Transcriptomic screen for senescence regulators**

209  
210 To associate expression variation in genes with sequence variation in their upstream binding  
211 sites for a given transcription factor, we proceeded as follows. From RNA-seq profiling of *M.*  
212 *musculus* x *M. spretus* F1 hybrid cells (see above), we used the TPM counts for each parent  
213 species' allele from each replicate profile from control and senescent conditions as input into a  
214 two-factor ANOVA. A given gene was categorized as exhibiting senescence-associated

215 differential allele specific expression if the interaction F statistic value from this ANOVA was  
216 among the top 25% of all genes tested. Separately, we used compiled data from chromatin  
217 immunoprecipitation via high-throughput sequencing from the Gene Transcription Regulation  
218 Database (GTRD) (37) to identify all experimentally determined transcription factor (TF) binding  
219 sites located within a 5kb window upstream of the transcriptional start site for each gene in turn  
220 in the *M. musculus* genome; we refer to the downstream gene of each such binding location as  
221 the target of the TF. This calculation used *M. musculus* gene start sites from the Ensembl  
222 GRCm38.96 GFF. Next, for each binding site, we used the VCF between PWK and STF  
223 pseudogenomes (see above) to identify single nucleotide variants between PWK and STF in the  
224 binding site locus. Now, for all the target genes of a given TF, we categorized them as having  
225 sequence variants or not in the respective binding site, and exhibiting senescence-associated  
226 differential allele-specific expression. We eliminated from further consideration any TF with  
227 fewer than 250 target genes in each of the four categories. For all remaining TFs, the 2 x 2  
228 contingency table was used as input into a Fisher's exact test with Benjamini-Hochberg multiple  
229 testing correction.

230

### 231 ***Usf2* shRNA vector design, construction and application**

232

233 *Usf2* knockdown shRNA sequences were obtained from the Broad Institute Genetic  
234 Perturbation Portal (<https://portals.broadinstitute.org/gpp/public/>). Two shRNA sequences for  
235 *Usf2*  
236 (CCGGGCAAGACAGGAGCAAGTAAAGCTCGAGCTTTACTTGCTCCTGTCTTGCTTTTTTTGAA  
237 T; CCGGACAAGGAGACATAATGCATTTCTCGAG-  
238 AAATGCATTATGTCTCCTTGTTTTTTTGAAT), and, separately, a scrambled control sequence  
239 (CCTAAGGTTAAGTCGCCCTCGCTCGAGCGAGGGCGACTTAACCTTAGG, Addgene cat.  
240 #1864), were each cloned into pLKO.1 puro lentiviral vectors (Addgene cat. #8453). Lentiviral  
241 particles containing each of the shRNA constructs were generated by calcium phosphate co-  
242 transfection of HEK 293T cells with the shRNA pLKO.1 puro vectors and separate  
243 pMDLg/pRRE packaging and pCMV-VSV-G envelope plasmids generously provided by Dr.  
244 Marius Walter of the Verdin Lab at the Buck Institute. The number of viral particles generated  
245 was determined using the Origene One-Wash™ Lentivirus Titer Kit, p24 ELISA (cat.  
246 #TR30038). These particles were used to infect two biological replicates of purebred *M.*  
247 *musculus* (PWK) primary tail fibroblasts at a multiplicity of infection of 5 with 4 µg/mL of  
248 polybrene, and infected cells were selected by incubating with 2 µg/mL puromycin for 10 days,  
249 changing media and antibiotic every other day. Knockdown of *Usf2* was determined by qPCR,  
250 using *Usf2* qPCR primer sequences chosen through NCBI Primer Blast, filtering for those  
251 spanning an exon-exon junction. The primer pair with the same efficiency (calculated as  $10^{(-1/\text{slope})}$   
252 when plotting log concentration of template cDNA versus Ct) as the internal control *Actb*  
253 qPCR primers was chosen: *Usf2* forward 5' TTCGGCGACCACAATATCCAG 3', *Usf2* reverse 5'  
254 TTCGGCGACCACAATATCCAG 3', *Actb* forward 5' CAACCGTGAAAAGATGACCC 3', *Actb*  
255 reverse 5' GTAGATGGGCACAGTGTGGG 3'. *Usf2* expression was calculated using the Delta-  
256 Delta Ct method (38).

257

### 258 **Cell proliferation and DNA damage assays**

259

260 For each of two biological replicates of purebred *M. musculus* (PWK) cells infected with  
261 lentivirus harboring the scrambled control and two of each *Usf2* knockdown, either before  
262 irradiation or 6 hours after irradiation (see above), we measured cell proliferation and DNA  
263 damage response as follows.

264

265 For a given replicate, DNA synthesis was measured via 5-ethynyl-2'-deoxyuridine (EdU)  
266 incorporation assays using the Invitrogen™ Click-iT™ Edu Alexa Fluor™ 488 Flow Cytometry  
267 Assay Kit (cat. #C10420). Comet assays were carried out to measure levels of DNA double  
268 stranded breaks for a given replicate culture as described (39).

269  
270 For H2AX assays, for a given replicate, cells were fixed, permeabilized, and blocked, then  
271 incubated with 1 µg/mL of primary antibodies specific to phosphorylated (Ser 139) H2AX (cat. #  
272 sc-517348, Santa Cruz Biotechnology) in 3% BSA overnight at 4°C. The following day the cells  
273 were washed in PBS three times before incubating with 2 µg/mL of Alexa 488 secondary  
274 antibodies purchased from Invitrogen (cat. # A11001) for two hours at room temperature. Cells  
275 were washed three times with PBS then incubated with 0.5 µg/mL DAPI for 5 minutes at room  
276 temperature. The cells were washed once more with PBS before mounting for imaging. Multiple  
277 representative confocal images of each sample were taken using a Zeiss LSM 710  
278 AxioObserver, and processed with ImageJ (40).

## 279 280 **Multivariate ANOVA of irradiation and senescence timecourse**

281  
282 To identify genes whose expression changed in wild-type cells through irradiation and  
283 senescence, we used RNA-seq profiling data from purebred *M. musculus* (PWK) cells harboring  
284 a scrambled shRNA before and 6 hours, 10 days, and 20 days after irradiation (see  
285 Supplemental Table S6) as input into a multivariate ANOVA test.

## 286 287 **MERLIN regulatory network reconstruction**

288  
289 To reconstruct a regulatory network we used RNA-seq profiling data for purebred *M. musculus*  
290 (PWK) cells harboring a scrambled shRNA or a *Usf2*-targeting RNA, before and 6 hours, 10  
291 days and 20 days after irradiation, as input into MERLIN (41) with default settings. Analysis  
292 used a catalog of murine transcription factors from the Gene Transcription Regulation Database  
293 (37).

## 294 295 **Results**

### 296 297 **High levels of senescence markers in *M. musculus* fibroblasts relative to other mice**

298  
299 To study natural variation in senescence phenotypes, we made use of a classic *in vitro* cell  
300 model of senescence, namely primary fibroblasts from mouse tail skin treated with 15 Gy of  
301 ionizing radiation (IR) (3,26). We isolated primary tail fibroblasts from the PWK and STF wild-  
302 derived purebred lines of *Mus musculus musculus* (hereafter *M. musculus*) and *M. spretus*  
303 respectively. Seven days after IR treatment, cells from both species had arrested growth and  
304 exhibited the expected flattened and enlarged morphologies of senescent cells (Figure 1A-B).  
305 Assaying these cultures for γH2AX foci, a marker of the DNA damage response and a hallmark  
306 of long-term senescence (42,43), we found that counts were indistinguishable in primary *M.*  
307 *musculus* and *M. spretus* fibroblasts after irradiation, though higher in the latter in the absence  
308 of treatment (Figure 1C). These data indicated that cells of both species had mounted the DNA  
309 damage response and entered the senescent state in our treatment and incubation regime.

310  
311 To begin to compare the senescence program between cells of *M. musculus* and *M. spretus*, we  
312 assayed primary fibroblasts from each species for senescence-associated β-galactosidase  
313 (SABG), which reports lysosomal hyperactivity during senescence and has served as a classic  
314 marker of senescence (44). After irradiation we detected robust signal in this assay from cells of

315 both species, as expected; however, the proportion of SABG-positive cells in *M. spretus*  
316 fibroblast cultures was two to eight-fold lower than that of *M. musculus* cells (Figure 2). Primary  
317 fibroblasts from *M. musculus domesticus*, a close relative of *M. musculus musculus*, exhibited  
318 an intermediate SABG staining after irradiation (Supplemental Figure S1). We conclude that in  
319 the irradiated fibroblast culture model, genotypes from distinct species encode a range of  
320 lysosomal activity phenotypes, with the most avid in *M. musculus musculus*.

### 321 322 **The high-amplitude SASP of *M. musculus* fibroblasts is unique relative to *M. spretus*** 323

324 In *M. musculus* cells, the massive lysosomal changes seen after irradiation likely result from  
325 overload of the proteostasis system during SASP production (45–47). Given that we had  
326 observed weaker effects of irradiation on lysosomal activity in fibroblasts from non-*M. musculus*  
327 species, we hypothesized that the latter would likewise exhibit a dampened-SASP phenotype.  
328 To test this, we focused on *M. musculus* and *M. spretus* as representatives of the extremes of  
329 the phylogeny. We profiled bulk RNA levels in irradiated and control primary fibroblast cultures  
330 from each species (Supplemental Table S1). In the resulting profiles, we inspected genes of the  
331 SASP immune-stimulatory program (4), and found that this gene cohort was induced more  
332 highly in *M. musculus* cells than in those of *M. spretus* after irradiation (Figure 3A). Likewise, in  
333 an unbiased search of Gene Ontology terms, we identified several suites of immune response  
334 and NF- $\kappa$ B signaling genes that were enriched for senescence-specific differential expression  
335 between the cultures (Figure 3B and Supplemental Tables S2 and S3). In each case, the gene  
336 groups were more strongly induced during senescence in *M. musculus* cells than in *M. spretus*  
337 cultures; among members of the latter we noted *Cxcl1* (Kim et al. 2018), *Il6* (49), *Ccls 2,7* and 8  
338 (50), *Mmp13* (51), and other reported SASP genes (Supplemental Figure S2). These data make  
339 clear that, at the level of mRNA, the senescence regulatory program differs markedly between  
340 fibroblasts of our focal species.

341  
342 We hypothesized that much of the mRNA expression divergence between *M. musculus* and *M.*  
343 *spretus* cells during senescence would result in differential protein abundance. In pursuing this  
344 notion, we focused on proteins secreted into the medium by senescent cells, owing to the  
345 physiological importance of the SASP (50). We collected conditioned media from senescent and  
346 control cultures of primary fibroblasts of each genotype, and we used it as input into unbiased  
347 mass spectrometry to quantify protein abundance (Supplemental Table S4). Focusing on  
348 proteins with a significant senescence-specific divergence in secretion between cells of the two  
349 species in this data source, we found higher levels overall in the medium of irradiated *M.*  
350 *musculus* cells relative to that of *M. spretus* (Figure 3C). This trend was borne out for a broad  
351 representation of SASP factors, including CCL chemokines, matrix metalloproteases, and  
352 serpins (Supplemental Figure S3). Together, our omics profiles reveal striking quantitative  
353 differences in SASP levels between *M. spretus* fibroblasts and those of *M. musculus*, with  
354 higher mRNA expression and protein secretion in the latter.

### 355 356 **A genomic screen for senescence transcription factors using *cis*-regulatory sequence** 357 **variations** 358

359 Having established divergence between *M. musculus* and *M. spretus* primary fibroblasts in  
360 senescence mRNA and protein secretion (Figure 3), we reasoned that such differences could  
361 be harnessed in an *in silico* screen for senescence regulators. We designed an analysis  
362 focused on gene regulation—in particular, on variation between the species at the binding sites  
363 of transcription factors (Figure 4A). We expected that, at some genes, *cis*-regulatory elements  
364 encoded in the *M. musculus* genome would drive expression during senescence differently than  
365 those in the *M. spretus* genome. We reasoned that if *cis*-acting variation effects were enriched



366 among the loci bound by a given transcription factor across the genome, the signal could be  
367 interpreted as a signpost for the factor's activity during senescence (Figure 4A). In this way, all  
368 *cis*-regulatory variants between the species that manifested in cultured primary fibroblasts,  
369 whether of large or small effect size, and regardless of their potential for phenotypic impact,  
370 could contribute to the search for transcription factors relevant for senescence.

371  
372 As a resource for this approach, we mated PWK *M. musculus* and STF *M. spretus* to yield F1  
373 hybrid animals, from which we derived primary tail fibroblasts for culture and irradiation. These  
374 cells, when irradiated, exhibited a flattened morphology reflecting entry into senescence;  
375 senescence-associated  $\beta$ -galactosidase activity was of a magnitude between those of purebred  
376 *M. musculus* and *M. spretus* fibroblasts upon irradiation (Supplemental Figure S4). We  
377 subjected senescent and control F1 hybrid fibroblasts to RNA-seq profiling, and we used the  
378 results to quantify levels of transcripts derived from the *M. musculus* and *M. spretus* alleles of  
379 each gene in each condition (Supplemental Table S1). At a given gene, any difference between  
380 allele-specific expression in an F1 hybrid can be attributed to variants inherited from the parent  
381 species that perturb gene regulation in *cis* at the locus, because *trans*-acting factors impinge to  
382 the same extent on both alleles (52). Analyzing the response to senescence induction for a  
383 given gene, we found that the allele-specific expression difference between the alleles in the F1  
384 hybrid was a partial predictor of the expression divergence between the *M. musculus* and *M.*  
385 *spretus* purebreds, in our primary cell system (Supplemental Figure S5). The latter trend reflects  
386 the joint contributions of *cis*- and *trans*-acting variants to total expression divergence between  
387 the species, as expected (53). Separately, to survey overall regulatory programs in F1 hybrid  
388 primary fibroblasts, we formulated the expression level of a given gene in a given condition as  
389 the sum of the measured levels of the *M. musculus* and *M. spretus* alleles. In this analysis,  
390 focusing on SASP genes as we had done for the purebreds (Figure 3A), we found that the  
391 expression program of senescent F1 hybrid cells was, for most components, intermediate  
392 between the low levels seen in *M. spretus* cells and the high levels in *M. musculus*  
393 (Supplemental Figure S6). These data indicate that *M. musculus* x *M. spretus* F1 hybrid  
394 fibroblasts do not exhibit heterosis with respect to senescence-associated genes, and do  
395 manifest extensive, senescence-dependent *cis*-regulatory variation.

396  
397 We next used the expression measurements from *M. musculus* x *M. spretus* F1 hybrid  
398 fibroblasts as input into our *in silico* screen to identify senescence-dependent transcription factor  
399 activity. For a given transcription factor, we collated binding sites detected by chromatin  
400 immunoprecipitation upstream of genes across a panel of tissues (37). At each site, we  
401 tabulated the presence or absence of DNA sequence variants in the respective genomes of *M.*  
402 *musculus* and *M. spretus*. We then tested whether, across the genome, genes with these  
403 binding site variants were enriched for senescence-associated expression differences between  
404 the two alleles in the F1 hybrid. This test had the capacity for high power to detect even subtle  
405 contributions from transcription factors if they had deep binding-site coverage in the input data;  
406 five factors attained genome-wide significance (Figure 4B and Supplemental Table S5). Among  
407 them, PBX1 (54) and CREBBP (55,56) had been implicated in cellular senescence in the  
408 previous literature, providing a first line of evidence for the strength of our approach to identify  
409 signatures of condition-dependent transcription factor function. The top-scoring transcription  
410 factor in our screen, a basic-helix-loop-helix leucine-zipper protein called upstream stimulatory  
411 factor 2 (USF2), had not been experimentally characterized in stress response or senescence.  
412 However, classic studies had established USF2 as a regulator of the cell cycle and tumor  
413 suppression (57–60). More recently, USF2 was shown to control cytokine release in immune  
414 cells (61). Considering these known functions, and bioinformatic analyses suggesting a link  
415 between USF2 and senescence programs (21), we chose USF2 for in-depth validation. In  
416 detailed genomic tests, single variants between *M. musculus* and *M. spretus* at USF2 binding

417 sites drove most of the relationship with allele-specific expression in hybrid senescent cells  
418 (Figure 4C). These variants were over-represented at positions central to, and slightly  
419 downstream of, experimentally determined peaks for USF2 (Figure 4D), highlighting the likely  
420 importance of this region in USF2's mechanisms of binding and regulation.

421

## 422 **USF2 modulates cell proliferation and the acute DNA damage response**

423

424 Our question at this point was whether and how USF2 regulated senescence programs. As  
425 such, we shifted our focus from natural genetic variation to controlled, laboratory-induced  
426 genetic perturbations in a single genetic background. We designed two short hairpin RNAs  
427 (shRNAs) targeting *Usf2*, each in a lentiviral vector under the U6 promoter. Expression  
428 measurements upon transformation of PWK *M. musculus* primary tail fibroblasts confirmed 2.5  
429 and 3-fold knockdown of *Usf2* expression, respectively, from these shRNAs (Supplemental  
430 Figure S7). In these otherwise untreated cells subject to knockdown, uptake of the nucleotide  
431 analog EdU, a marker of DNA synthesis, was reduced by 40% (Supplemental Figure S8),  
432 consistent with studies of USF2 in growth of resting cells in other tissues and contexts (27,57–  
433 60).

434

435 We now set out to use our knockdown approach to define the role of USF2 in the acute DNA  
436 damage response and senescence. For this purpose, we infected cells with *Usf2* shRNAs,  
437 cultured them under standard conditions, and then induced senescence by irradiation. DNA  
438 damage signaling, an inducer of cellular senescence (2,3), drops sharply in intensity within eight  
439 hours and then more gradually over several day after irradiation (62), culminating in a lower  
440 persistent signal (43,63–65). We first focused on the early phase of this process (six hours after  
441 irradiation) in cultures of primary fibroblasts expressing *Usf2* shRNAs or scrambled shRNA  
442 controls (Figure 5A). Transcriptional profiling followed by Gene Ontology analyses identified  
443 gene groups enriched for expression changes dependent on condition and USF2 (Figure 5B  
444 and Supplemental Tables S6 and S7). Most salient was a trend of pervasive repression  
445 transcriptome-wide six hours after irradiation, which was detected in control cells as expected  
446 (66,67), and was blunted in cells with *Usf2* knocked down. The latter effect was particularly  
447 enriched in the transcriptional machinery, repressors of apoptosis, and several cell proliferation  
448 regulators (Figure 5B-D and Supplemental Figure S9). DNA repair genes, a likely target for  
449 changes upon irradiation, are regulated primarily at the post-transcriptional level (68,69), and we  
450 did not detect effects of *Usf2* knockdown on their transcripts (Supplemental Figure S10).

451

452 We hypothesized that *Usf2* knockdown during the acute DNA damage response would also  
453 have cell-physiological effects. Assays of EdU incorporation to report on DNA synthesis showed  
454 effects of *Usf2* knockdown after irradiation to the same degree as in resting cultures  
455 (Supplemental Figure S7). To focus on phenotypes more proximal to DNA damage, we used  
456 the neutral comet assay (39) to measure DNA double-stranded breaks on a per-cell basis. In  
457 this setup, *Usf2* depletion increased comet tail moments by 50% six hours after irradiation, with  
458 an effect that was similar, though of smaller magnitude, in resting cell controls (Figure 5E). Next,  
459 we tracked foci of phosphorylated histone H2AX ( $\gamma$ H2AX) in fibroblasts as a marker of chromatin  
460 decondensation, preceding the repair of DNA double-stranded breaks (70). Cells harboring *Usf2*  
461 shRNAs exhibited 30% fewer  $\gamma$ H2AX foci than cells of the control genotype, six hours after  
462 irradiation (Figure 5F). These data establish a role for USF2 in the response to irradiation, with  
463 knockdown of this factor compromising cells' ability to mount the classical transcriptional  
464 program under this stress, and to carry out DNA damage repair.

465

## 466 **USF2 tunes the commitment to senescence**

467

468 Having knocked down *Usf2* in PWK primary fibroblasts and irradiated them to study the acute  
469 DNA damage response, we now allowed the irradiated cultures to enter senescence (Figure  
470 6A). We referred to this as a “knockdown-then-irradiate” experimental design (SH -> SEN in  
471 Figure 6). Growth arrest and flattened morphology were indistinguishable between these cells  
472 and controls harboring scrambled shRNAs (see Figure 6C), indicating that wild-type levels of  
473 *Usf2* were not required at the point of irradiation to establish senescence *per se*. To investigate  
474 quantitative characteristics of these senescent cultures, we subjected them to expression  
475 profiling and Gene Ontology enrichment analyses (Figure 6B and Supplemental Tables S6 and  
476 S8). Among top-scoring gene groups, the most dramatic effects were in those that dropped in  
477 expression in senescent cultures of the control genotype, which as expected (17,71) included  
478 cell cycle and DNA repair pathways (Figure 6B and Supplemental Table S8). Intriguingly, mRNA  
479 levels of the latter were even lower in senescent cells that had been irradiated after *Usf2*  
480 knockdown, showing a reduction of ~20% on average (Figure 6B). Among the genes of this  
481 cohort, some of which declined in expression by >5-fold with *Usf2* knockdown in senescence,  
482 we noted cell cycle regulators (*Ccna2*, *Cdc20*, *Cdk1*), kinesin components (*Kif2c*, *Kn11*), the  
483 DNA polymerase *Pole*, and the DNA damage checkpoint ubiquitin ligase *Uhrf1* (Supplemental  
484 Figure S11A). We conclude that genes of the cell cycle and DNA repair machinery are  
485 detectable at a low but non-zero expression level in wild-type senescent cells, and that these  
486 pathways are subject to further reduction when *Usf2* is limiting.

487  
488 Likewise, *Usf2* knockdown also affected inflammation and immune-recruitment factors (Figure  
489 6B and Supplemental Table S8). Cells of the control genotype induced these pathways during  
490 senescence, as expected (2,3,9,49,72,73); in cells reaching senescence after *Usf2* knockdown,  
491 induction of inflammatory factors was amplified by ~10% on average (Figure 6B and  
492 Supplemental Figure S11B). Similarly, in assays of the  $\beta$ -galactosidase senescence marker, we  
493 observed a 10% increase in cells subject to *Usf2* knockdown and senescence treatment (Figure  
494 6C). Together, our profiling data establish that irradiation of primary fibroblasts with reduced  
495 *Usf2* expression leads to a quantitatively perturbed, exaggerated senescent state, with reduced  
496 expression of proliferation and DNA repair pathways, and elevated pro-inflammatory gene  
497 expression and  $\beta$ -galactosidase activity.

498  
499 We reasoned that the changes in senescence we had seen upon irradiation of *Usf2*-depleted  
500 cells could constitute, in part, effects from increased DNA damage in the knockdown genotype  
501 (Figure 5). To pursue the role of USF2 in senescence more directly, we used a distinct  
502 experimental paradigm: we irradiated wild-type cells and incubated them for 10 days to allow  
503 establishment of senescence, and we then expressed shRNAs targeting *Usf2*, followed by 10  
504 additional days of incubation (Figure 6D). We referred to this as an “irradiate-then-knockdown”  
505 experiment (SEN -> SH in Figure 6). We first inspected control cells for this paradigm, harboring  
506 a scrambled shRNA. Here RNA-seq revealed expression changes for many genes from the  
507 resting state through irradiation and early and late senescence (Supplemental Tables S6 and  
508 S9, and Supplemental Figure S12), attesting to the dynamics of senescence as expected  
509 (17,71). We next carried out RNA-seq and GO term enrichment analysis of cultures subject to  
510 *Usf2* knockdown during late senescence (Figures 6D-G and Supplemental Tables S6 and S10),  
511 for comparison to our “knockdown-then-irradiate” strategy (Figure 6A). On average, cell cycle  
512 and DNA repair genes, repressed in control cells during senescence, were expressed at even  
513 lower levels when *Usf2* was knocked down midway through the senescence time course; this  
514 was analogous to our findings upon early knockdown of *Usf2* (compare lavender to magenta in  
515 Figure 6G and Supplemental Figure S11A). Likewise, inflammatory response factors, induced  
516 during senescence in the control setting, were more highly expressed in the “irradiate-then-  
517 knockdown” approach, consistent with our findings from the early-knockdown design (compare  
518 lavender to magenta in Figure 6F and Supplemental Figure S11B). We noted only a handful of

519 genes for which early *Usf2* knockdown effects were not recapitulated in our paradigm of  
520 knockdown after senescence entry (e.g. *Adamts1* and *Rarres2* in Supplemental Figure S11B).  
521 Overall, our analyses establish USF2 as a senescence regulator at least in part independent of  
522 its role in the acute DNA damage response, such that in its absence, cells commit even more  
523 strongly to the senescent state.  
524

## 525 Discussion

526  
527 Complex regulatory networks likely underlie many of the quantitative behaviors of senescent  
528 cells, including kinetics and dependence on cell type and inducer (15,17,26,74,75). Exactly how  
529 these nuances are encoded remains poorly understood. In this study, we pioneered the use of  
530 interspecies genetic divergence to screen for components of the senescence regulatory  
531 machinery. This strategy complements previous studies of transcription factor binding sites in  
532 genes of the senescence program in a single genetic background (17,21). Our approach  
533 harnesses the correlation between interspecies variation in sequence and expression levels, as  
534 an additional line of evidence for senescence-specific regulatory functions by a given factor.  
535 This paradigm parallels similar tools previously used to dissect divergence in expression (76,77)  
536 and transcription factor binding (78–80) in other contexts. Broadly speaking, these methods are  
537 not highly powered for pathways under strong evolutionary constraint, which, by definition, will  
538 not vary enough among species to yield the raw observations that would go into a screening  
539 pipeline. Rather, we expect the natural variation-based approach to work best for discovering  
540 less-constrained modifiers, many of which may confer layers of quantitative regulation onto a  
541 master regulatory pathway.  
542

543 We focused our experimental validation on one such modifier, the transcription factor USF2. By  
544 tracing USF2's function in proliferation and genome-wide expression in untreated cells, we  
545 extended conclusions from studies of USF2 in tumor suppression and cell cycle regulation (57–  
546 59,61), apoptosis (81) and ERK1/2 signaling (82). In an acute DNA damage setting, we  
547 discovered that USF2 is required for cells to mount DNA repair and downstream DNA damage  
548 responses. And in senescence proper, we showed that USF2 acts as a repressor, such that in  
549 its absence, the senescence program—shutoff of cell proliferation and DNA repair, and  
550 induction of cytokines—is amplified. A compelling model is thus that even long after damage  
551 exposure, cells have access to expression states along a continuum of commitment to  
552 senescence, and that USF2 acts to help determine which state they occupy. If so, USF2 would  
553 take a place among a network of factors, including p53, ING, Rb (83,84), p21 (85,86), and p16  
554 (87), that govern the choice between senescence, apoptosis, and repair and proliferation,  
555 depending on cell type (83) and the amount of damage or stress incurred (84).  
556

557 As a corollary of these conclusions from expression profiling, we note that cell cycle and DNA  
558 repair genes, classically known to be repressed during senescence (17,71), did not hit a floor of  
559 expression in senescent cultures: we could detect them at even lower expression levels upon  
560 *Usf2* knockdown. Since our cultures comprise >99% arrested cells within several days of  
561 irradiation (see Supplemental Methods), the emerging picture is that the proliferation machinery  
562 is maintained at non-zero levels even in such a population. Any ability of these gene products to  
563 reattain activity could be of particular interest as a potential mediator of the return to proliferation  
564 seen among senescent cells in certain scenarios (88,89).  
565

566 Our work leaves open the mechanisms by which USF2 exerts its effects in the DNA damage  
567 response and cellular senescence. It is tempting to speculate that USF2 ultimately works in  
568 these processes in concert with its better-studied family member, USF1. Indeed, USF1 has

569 been implicated in DNA repair (90), inflammation (91,92), immune responses (93), and p53-  
570 mediated cell cycle arrest (94) in contexts other than senescence. In addition, given that USF2  
571 has been implicated in the TGF $\beta$ -p53 axis in apoptosis (81) and fibrosis (95), the latter pathway  
572 could mediate some part of the USF2 effects we have seen. Furthermore, regulatory network  
573 reconstruction (41) suggests that USF2 acts upstream of several other transcription factors  
574 (KLF3, GLI3, NFIL3) with direct targets in DNA repair, DNA damage response, and senescence  
575 pathways (Supplemental Table S11).

576  
577 Alongside our use of *cis*-regulatory variation between mouse species as a screening tool for  
578 senescence genes, we also characterized overall patterns of divergence between *M. spretus*  
579 senescent cells and those of *M. musculus*. Given that the former exhibited lower levels of SASP  
580 mRNAs and proteins, we suggest that the rheostat of the senescence response is at a higher  
581 set point in this species, such that at a given level of stress (e.g. the irradiation we study here),  
582 cells of this species synthesize and secrete less of the SASP. Under this model, the decision set  
583 point for commitment to senescence by irradiated cells is similar across species, and,  
584 considered at any given time after damage exposure, it is the amplitude of the SASP that has  
585 been tuned by evolution. Such an idea would have precedent in the gradual ramp-up of  
586 senescence expression in *M. musculus* cells (17): plausibly, *M. spretus* could be hard-wired for  
587 slower kinetics of this progression, in the fibroblasts we study here. *M. spretus* cells could also  
588 simply cap the amplitude of their SASP, limiting the immune recruitment function of senescent  
589 cells at any timepoint.

590  
591 We further hypothesize that the dampened SASP might be a proximal cause for the lower  
592 senescence-associated  $\beta$ -galactosidase activity we have seen in *M. spretus* cells. Such a link  
593 would follow from current models of the senescent state in which production and secretion of  
594 SASP components (96) leads to proteotoxic stress from insoluble aggregates (45,46), an  
595 increase in the number and size of lysosomes (97), and enhanced  $\beta$ -galactosidase activity (98).  
596 Plausibly, any of the phenotypes we study here in cell culture could have consequences *in vivo*,  
597 with potential links to the stress- and pathogen-resistance phenotypes characterized in *M.*  
598 *spretus* (99–103).

599  
600 The low-amplitude senescence program we have seen in *M. spretus* provides an intriguing  
601 contrast to the trend for fibroblasts from naked mole rat in culture to avoid both senescence and  
602 apoptosis altogether, after irradiation (104). Instead, a given naked mole rat cell can often  
603 resolve DNA damage sufficiently to re-enter the cell cycle, to a degree several-fold beyond that  
604 seen in *M. musculus*. Likewise, the beaver allele of the DNA damage factor SIRT6 confers a  
605 similar effect in a heterologous system (105). These represent evolutionary innovations in other  
606 rodents distinct from the quantitative tuning of senescence expression we have traced in *Mus*.  
607 The emerging picture is one in which no single irradiation response mechanism manifests in all  
608 species, even in the simplest cell culture systems. Indeed, against the backdrop of the classic  
609 literature on *M. musculus* senescence (49,106), many other irradiation response behaviors may  
610 remain to be discovered in additional non-model species. Human cells exhibit an avid  
611 senescence response, on par with that of *M. musculus* (49). As such, the programs nature has  
612 invented in other lineages may hold promise in the search for therapeutics that would tamp  
613 down the pro-aging effects of senescence in a clinical context.

## 614 615 Ethics declarations

616  
617 *Ethics approval and consent to participate:* All methods used in animal husbandry and sample  
618 collection were approved under Montana Institutional Animal Care and Use Committee protocol

619 number 062-1JGDBS-120418 and reported in accordance with the ARRIVE guidelines  
620 (<https://arriveguidelines.org>). All other methods described were performed in accordance with  
621 the rules and regulations of the corresponding institutions.

622

623 *Conflict of interest:* The authors report no conflicts of interest.

624

625 *Consent for publication:* Not applicable.

626

## 627 Availability of data and materials

628

629 The datasets supporting the conclusions of this article are available in the NCBI Gene  
630 Expression Omnibus (GEO; <https://www.ncbi.nlm.nih.gov/geo/>) under accession number  
631 GSE201217. Raw data and complete MS data sets have been uploaded to the Mass  
632 Spectrometry Interactive Virtual Environment (MassIVE) repository, developed by the Center for  
633 Computational Mass Spectrometry at the University of California San Diego, and can be  
634 downloaded using the following link:

635 <http://massive.ucsd.edu/ProteoSAFe/status.jsp?task=5e7aa6a2b31f4dcfafa679e9d3f3d9c3>  
636 (MassIVE ID number: MSV000089246; ProteomeXchange ID: PXD033182), with username:  
637 MSV000089246\_reviewer, and password: winter.

638

## 639 Acknowledgements

640

641 The authors thank Mary West for support of cell culture resources, Melissa Chao for help with  
642 data collection, Michael Nachman for *M. domesticus* animal material, and Herbert Kasler,  
643 Marius Walter, and Eric Verdin for helpful discussions and materials.

644

## 645 Funding

646

647 This work was supported by National Institutes of Health R01 NS116992 and R01 GM120430 to  
648 R.B.B and R01 HD094787 to J.M.G. E.E.K.K. was supported by the National Science  
649 Foundation Graduate Research Fellowship Program (DGE-1313190). Any opinions, findings,  
650 and conclusions or recommendations expressed in this material are those of the author(s) and  
651 do not necessarily reflect the views of the National Science Foundation or the National Institutes  
652 of Health.

653

## 654 Author contributions

655

656 RBB and TK conceived of the idea of the study; TK carried out fibroblast harvest and culture,  
657 RNA-seq, knockdown, and cell-biological assays and all data analysis. BS and CDK carried out  
658 proteomics profiling. ECKK, ECM, and JMG carried out all mouse mating and husbandry. TK,  
659 JC, and RBB wrote the manuscript with input from all authors.

660

661

662 Figures  
663

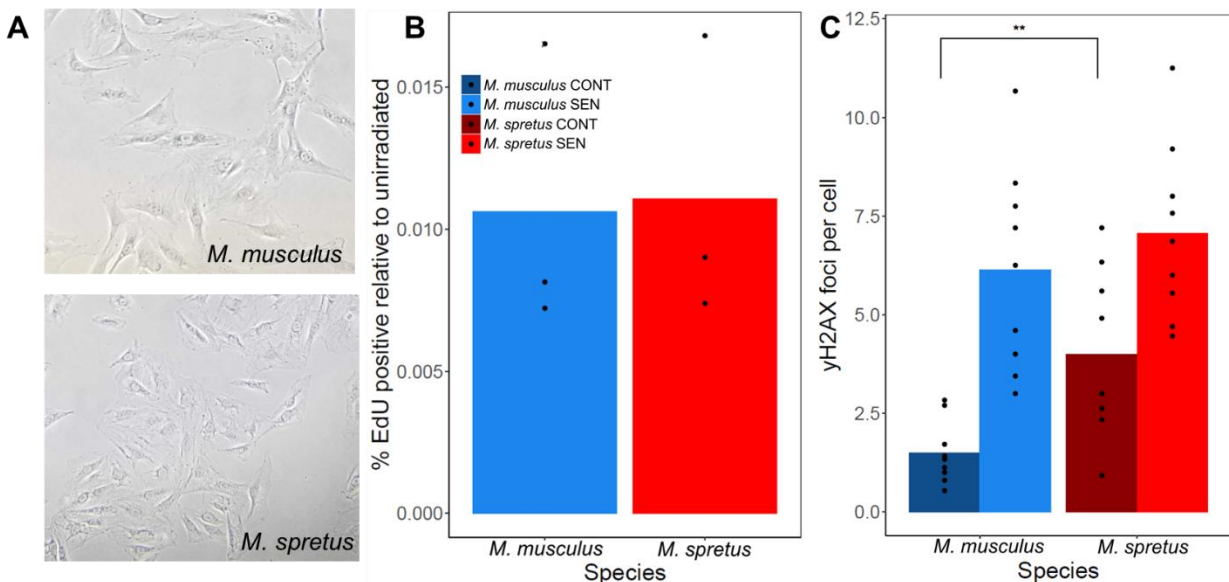

664 **Figure 1: Cells from both *M. musculus* and *M. spretus* mice display expected**  
665 **morphologies of senescence.** (A) Representative images of senescent primary fibroblasts  
666 from *M. musculus* (above) and *M. spretus* (below) seven days after irradiation exhibiting a  
667 flattened and enlarged morphology. (B) Each column reports the average percentage of cells  
668 with EdU incorporation seven days after IR treatment (SEN) set relative to the same in  
669 unirradiated controls (CONT) for each species reported in (A). For a given column, points report  
670 biological and technical replicates (*M. musculus*  $n = 3$ , *M. spretus*  $n = 3$ ). (C) Each columns  
671 reports the average number of  $\gamma$ H2AX foci per cell for each species as reported in (B). For a  
672 given column, points represent biological and technical replicates (*M. musculus*  $n = 9$ , *M.*  
673 *spretus*  $n = 9$ ). \*\*,  $p < 0.01$ , one-tailed Wilcoxon test comparing species.  
674

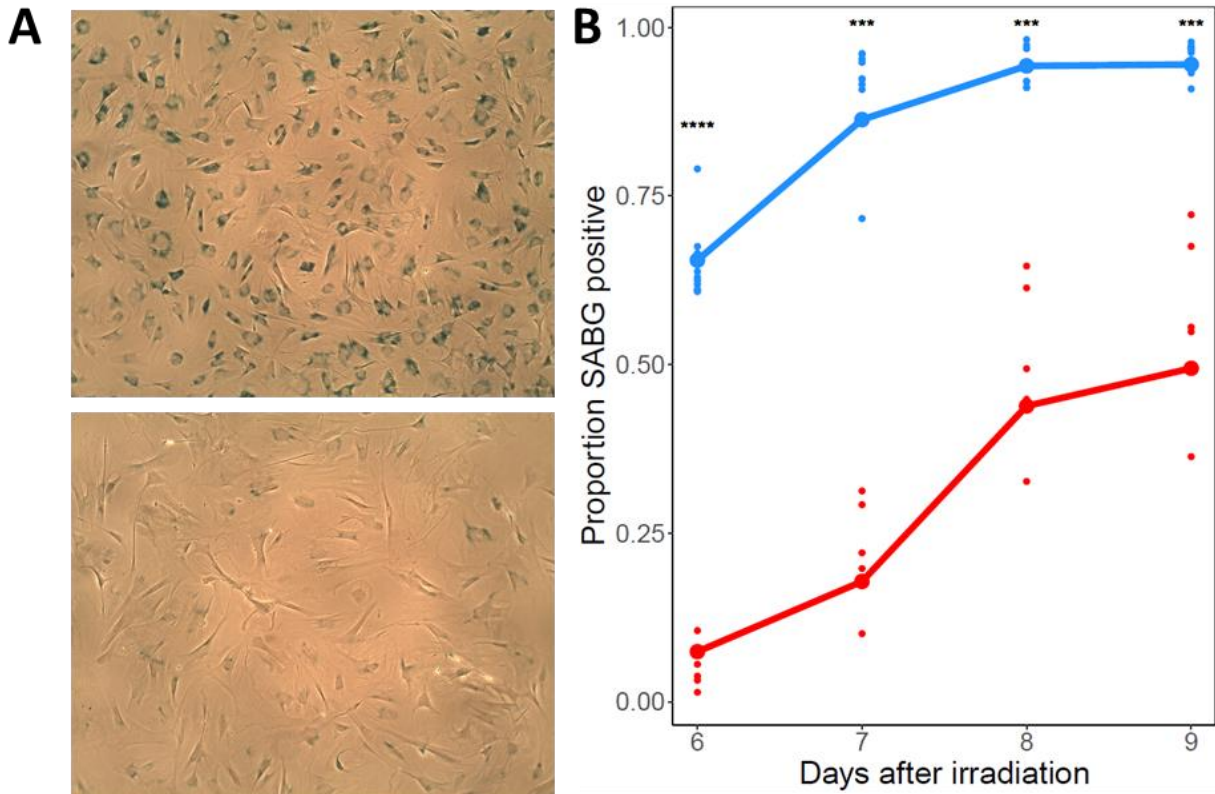

675 **Figure 2: Senescent *M. spretus* cells exhibit lower  $\beta$ -galactosidase activity.** (A)  
676 Representative images of senescent primary fibroblasts from *M. musculus* (above) and *M.*  
677 *spretus* (below) stained with the  $\beta$ -galactosidase indicator X-Gal seven days after irradiation. (B)  
678 Each trace reports results from a timecourse of X-Gal staining assays of primary senescent  
679 cells of the indicated species as in (A). The y-axis reports the proportion of cells stained positive  
680 for senescence-associated  $\beta$ -galactosidase (SABG) activity. In a given column, small points  
681 report biological and technical replicates and large points report their average (*M. musculus*  $n =$   
682 9, *M. spretus*  $n = 5$ ). \*\*\*,  $p < 0.001$ , \*\*\*\*,  $p < 0.0001$ , one-tailed Wilcoxon test comparing  
683 species.  
684



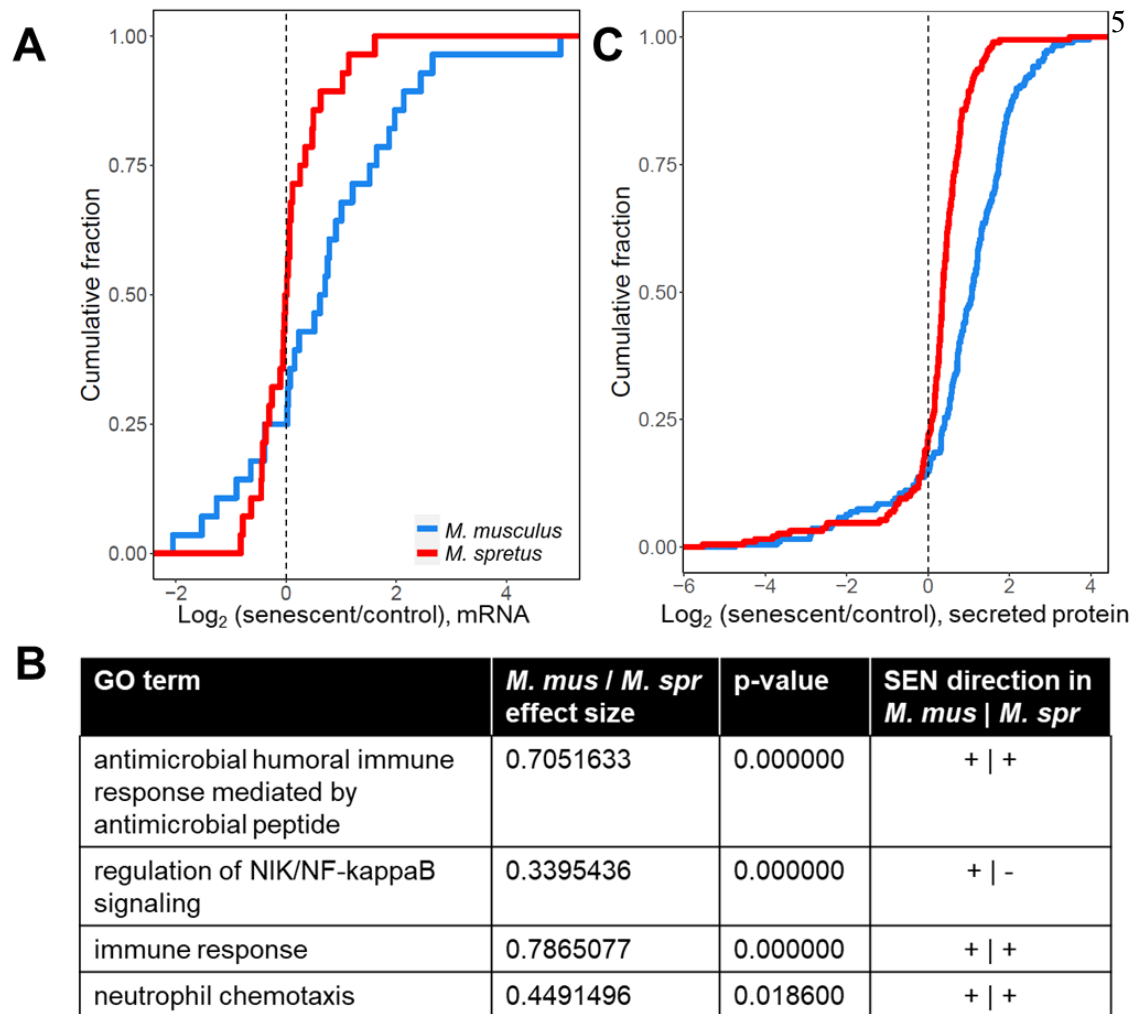

686 **Figure 3: SASP is detected at higher levels in *M. musculus* cells.** (A) Each trace reports a  
 687 cumulative distribution of the change, in senescent primary fibroblasts of the indicated species, in  
 688 mRNA levels of genes of the senescence associated secretory phenotype with senescence  
 689 (Coppé et al. 2008). The y-axis reports the proportion of genes with the expression change on  
 690 the x-axis, with the latter taken as an average across replicates. (B) Each row shows results from  
 691 a test of the genes of the indicated Gene Ontology term for enrichment of expression change  
 692 between the species during senescence, with *p*-values from a resampling-based test, corrected  
 693 for multiple testing. (C) Annotations are as in (A) except that measurements were of secreted  
 694 peptides, and a curated list of known SASP factors are shown (Coppé et al. 2008; Basisty et al.  
 695 2020).  
 696

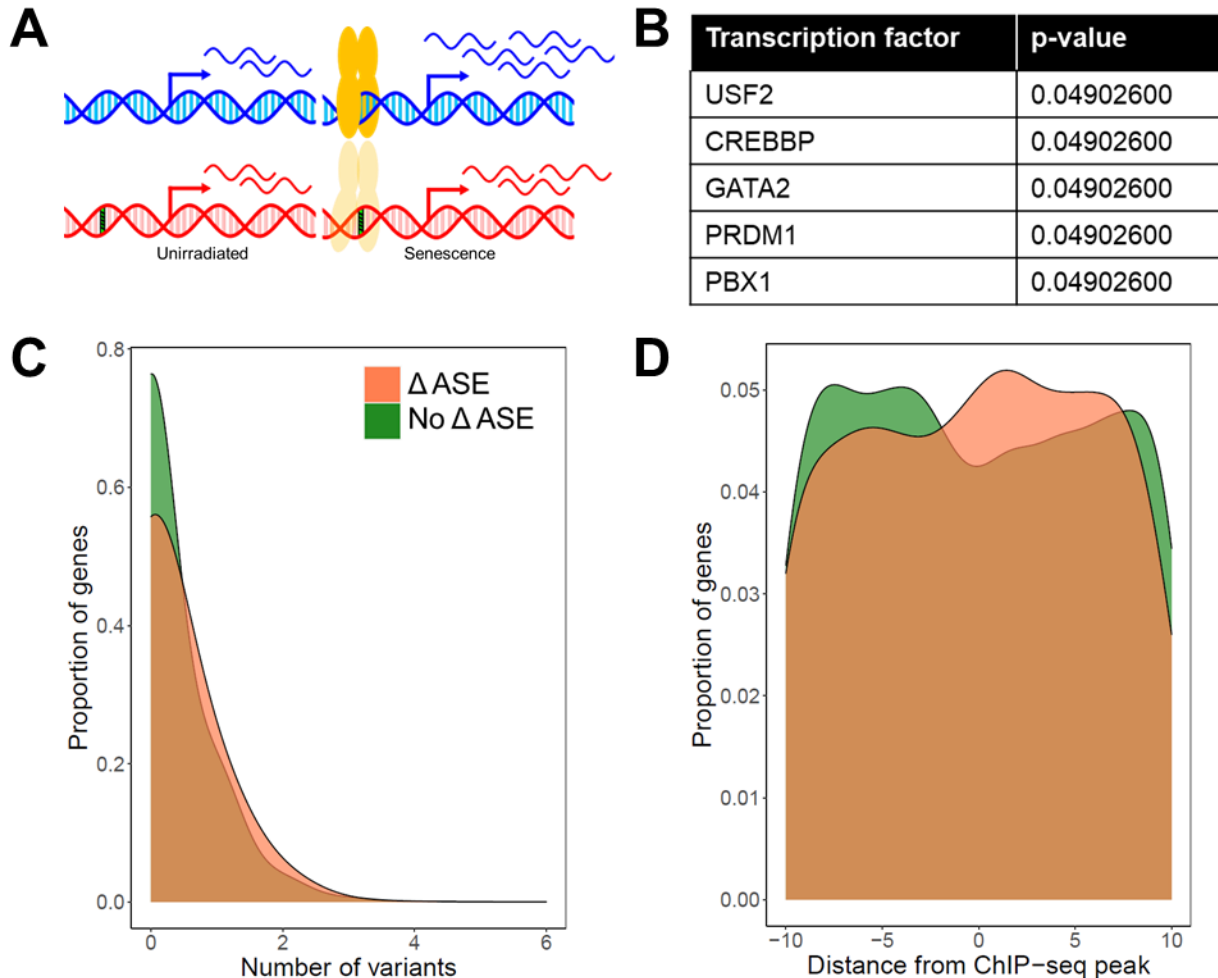

697 **Figure 4: USF2 emerges as a senescence regulator candidate from a natural variation-**  
 698 **based transcription factor screen.** (A) *M. musculus* (blue) and *M. spretus* (red) alleles of a gene  
 699 are expressed differently in interspecific F1 hybrid cells in a senescence-dependent manner, as  
 700 a product of a sequence variant (green striped) in the binding site for a transcription factor (yellow).  
 701 (B) Each row reports the multiple testing-corrected  $p$ -value from a Fisher's Exact Test of target  
 702 genes of the indicated transcription factor, quantifying association between species differences in  
 703 experimentally determined binding sites (37) and allele-specific expression in primary cells of the  
 704 *M. musculus*  $\times$  *M. spretus* F1 hybrid background before and after senescence induction. Results  
 705 for all tested factors are listed in Supplemental Table 5. (C) Shown are the input data for the  
 706 Fisher's Exact Test in (B) for USF2. For each trace, the x-axis reports the number of sequence  
 707 variants between *M. musculus* and *M. spretus* in a given USF2 binding site, and the y-axis reports  
 708 the proportion of all USF2 target genes bearing the number of variants on the x, as a kernel  
 709 density estimate. Colors denote the presence or absence of senescence-dependent differential  
 710 allele-specific expression ( $\Delta$  ASE). (D) Data are as in (C) except that the x-axis reports the  
 711 distance of the variant from the center of the USF2 binding site.  
 712

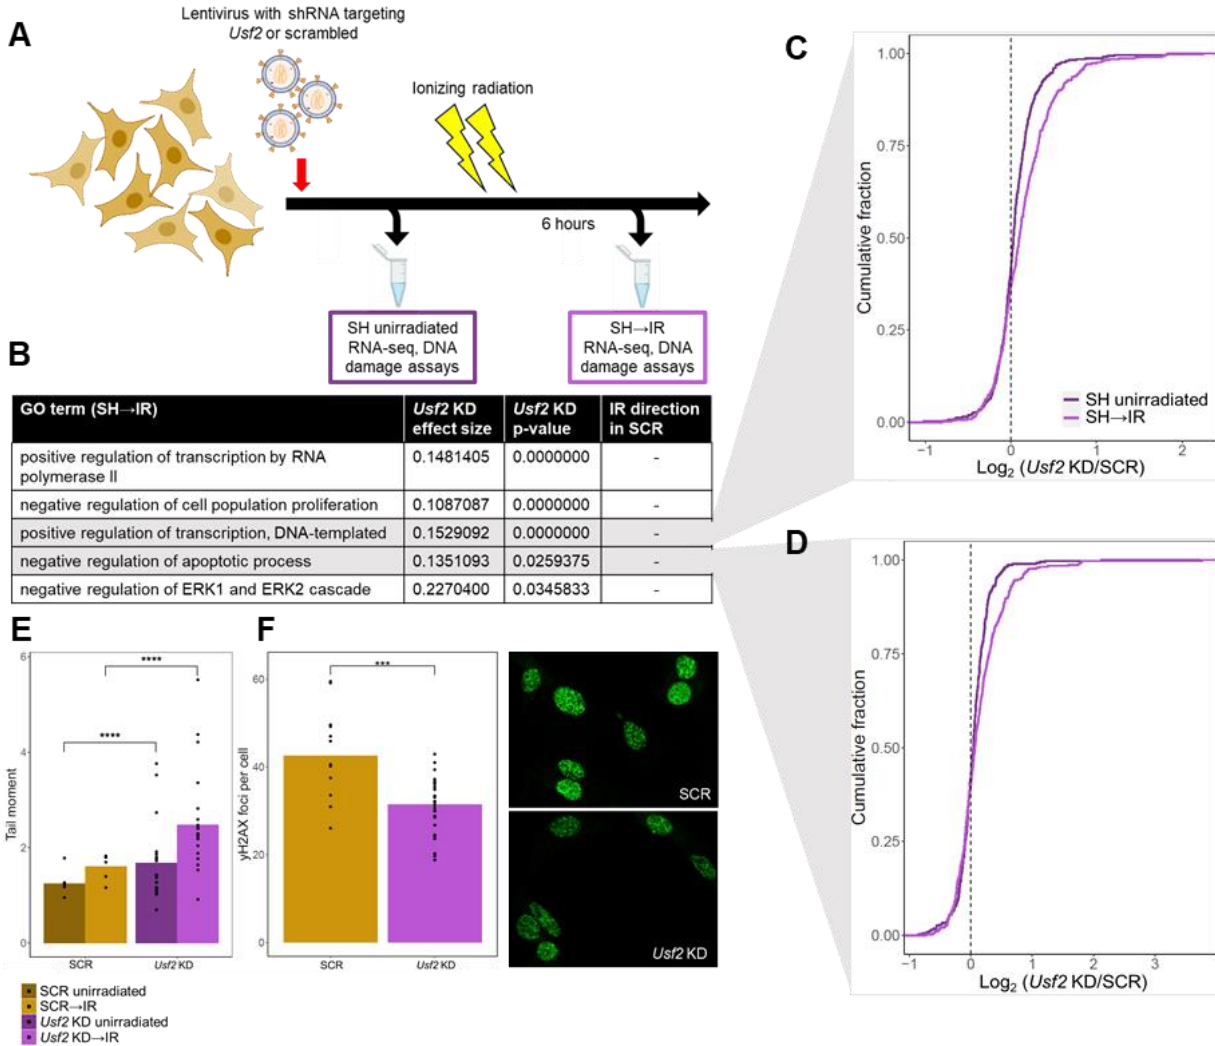

713 **Figure 5: *Usf2* depletion results in more DNA damage but a muted DNA damage response**  
 714 **following irradiation.** (A) *M. musculus* primary fibroblasts were infected with a lentivirus  
 715 encoding a short hairpin RNA (shRNA, SH) targeting *Usf2* or a scrambled control (SCR), and  
 716 analyzed before (SH unirradiated) or six hours after (SH->IR) treatment with ionizing radiation.  
 717 (B) In a given row, the second column reports the average, across genes of the indicated Gene  
 718 Ontology term, of the log<sub>2</sub> of the ratio of expression between *Usf2* knockdown (KD) and SCR-  
 719 treated cells, six hours after irradiation. The third column reports significance in a resampling-  
 720 based test for enrichment of directional differential expression between *Usf2* KD and SCR-treated  
 721 cells in the respective term, corrected for multiple testing. The fourth column reports the direction  
 722 of the change in expression six hours after irradiation in SCR-treated cells. (C) Each trace reports  
 723 a cumulative distribution of the log<sub>2</sub> of the ratio of expression between *Usf2* KD or SCR-treated  
 724 cells in genes annotated in the positive regulation of transcription, before or six hours after  
 725 irradiation treatment as indicated. The y-axis reports the proportion of genes with the expression  
 726 change on the x-axis. (D) Data are as in (C), except that genes involved in apoptosis were  
 727 analyzed. (E) Each column reports tail moments detected in a comet assay on primary fibroblasts  
 728 harboring the indicated shRNAs, before or six hours after irradiation. In a given column, points  
 729 report biological and technical replicates and the bar height reports their average (SCR *n* = 5,  
 730 *Usf2* KD *n* = 20). \*\*\*\*, *p* < 0.0001, one-tailed Wilcoxon test. (F) Left, each column reports number  
 731 of γH2AX foci per cell detected in primary fibroblasts harboring the indicated shRNAs six hours

732 after irradiation. Data are displayed as in (E) (SCR  $n = 12$ , *Usf2* KD  $n = 28$ ). \*\*\*,  $p < 0.001$ , one-  
733 tailed Wilcoxon test. Right, representative images of the indicated cultures.  
734

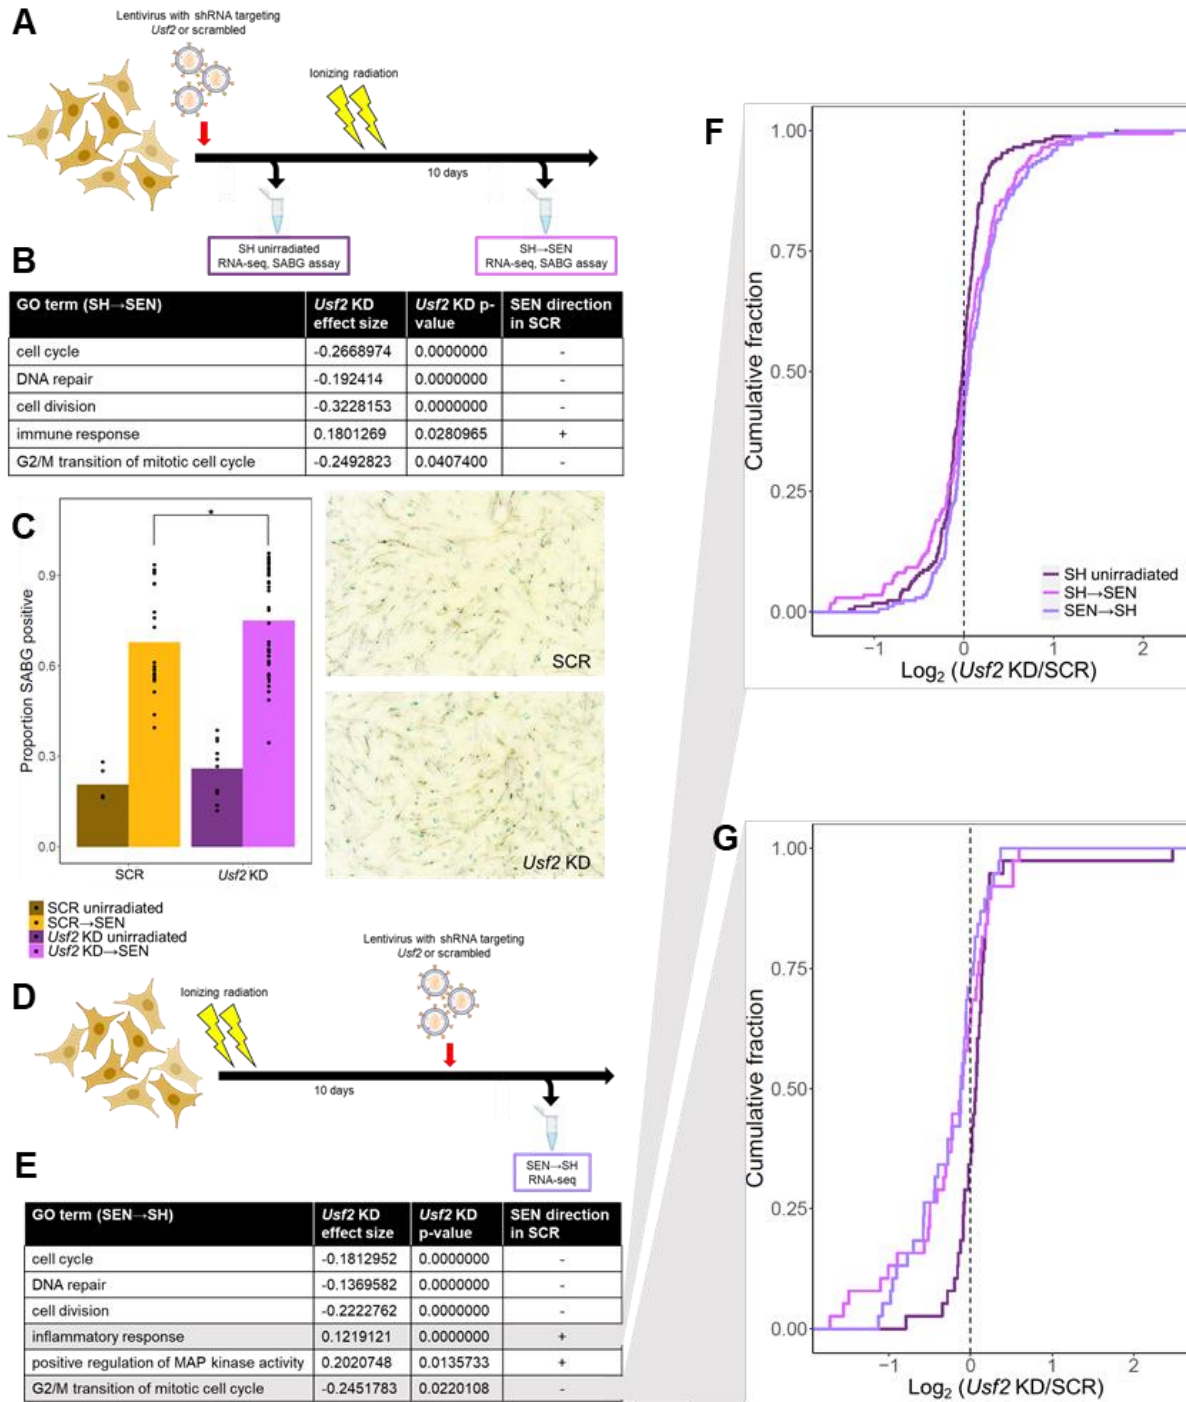

735 **Figure 6: *Usf2* knockdown results in an enhanced senescence profile.** (A) *M. musculus*  
 736 primary fibroblasts were infected with a lentivirus encoding an shRNA (SH) targeting *Usf2* or a  
 737 scrambled control, and analyzed before (SH unirradiated) or after (SH→SEN) treatment with  
 738 ionizing radiation (IR) to induce senescence (SEN). (B) Data are as in Figure 4B except that  
 739 cells were analyzed 10 days after irradiation. (C) Left, each column reports the proportion of  
 740 senescence associated  $\beta$ -galactosidase (SABG)-positive cells treated with the indicated  
 741 shRNAs in resting culture (unirradiated) or 7 days after irradiation (SEN) as in (A). In a given  
 742 column, points report biological and technical replicates and the bar height reports their average  
 743 (SCR unirradiated  $n = 5$ , SCR SEN  $n = 21$ , *Usf2* KD unirradiated  $n = 10$ , *Usf2* KD SEN  $n = 42$ ).

744 \*,  $p < 0.05$ , one-tailed Wilcoxon test. Right, representative images of the indicated cultures. (D)  
745 *M. musculus* primary fibroblasts were irradiated, incubated for 10 days to senesce, then infected  
746 with shRNAs and analyzed after 10 additional days. (E) Data are as in (B) except that cells from  
747 the scheme in (D) were analyzed. (F) Each trace reports a cumulative distribution of the  $\log_2$  of  
748 the ratio of expression in *Usf2* knockdown (KD) and scrambled control (SCR)-treated cells, in  
749 genes annotated in the inflammatory response, when shRNAs were administered to a resting  
750 culture (SH unirradiated), to resting cells followed by irradiation as in (A) (SH→SEN), or after  
751 irradiation and senescence establishment as in (C) (SEN→SH). The  $y$ -axis reports the  
752 proportion of genes with the expression change on the  $x$ -axis, with the latter taken as an  
753 average across replicates. (G) Data are as in (F), except that genes involved in G2/M transition  
754 of mitotic cell cycle were analyzed.  
755

## 756 References

- 757
- 758 1. Hayflick L. The limited in vitro lifetime of human diploid cell strains. *Exp Cell Res.* 1965  
759 Mar 1;37(3):614–36.
- 760 2. Campisi J. Senescent cells, tumor suppression, and organismal aging: good citizens,  
761 bad neighbors. *Cell.* 2005 Feb 25;120(4):513–22.
- 762 3. Campisi J, Fagagna FDD. Cellular senescence: when bad things happen to good cells.  
763 *Nat Rev Mol Cell Biol.* 2007;
- 764 4. Coppé JP, Patil CK, Rodier F, Sun Y, Muñoz DP, Goldstein J, et al. Senescence-  
765 Associated Secretory Phenotypes Reveal Cell-Nonautonomous Functions of Oncogenic  
766 RAS and the p53 Tumor Suppressor. *PLOS Biol.* 2008 Dec 2;6(12):e301.
- 767 5. Wan M, Gray-Gaillard EF, Elisseeff JH. Cellular senescence in musculoskeletal  
768 homeostasis, diseases, and regeneration. *Bone Res.* 2021 Sep 10;9(1):1–12.
- 769 6. Paramos-de-Carvalho D, Jacinto A, Saúde L. The right time for senescence. Bronner  
770 ME, editor. *eLife.* 2021 Nov 10;10:e72449.
- 771 7. Baker DJ, Wijshake T, Tchkonia T, LeBrasseur NK, Childs BG, van de Sluis B, et al.  
772 Clearance of p16Ink4a-positive senescent cells delays ageing-associated disorders.  
773 *Nature.* 2011 Nov 2;479(7372):232–6.
- 774 8. Demaria M, Ohtani N, Youssef SA, Rodier F, Toussaint W, Mitchell JR, et al. An  
775 essential role for senescent cells in optimal wound healing through secretion of PDGF-  
776 AA. *Dev Cell.* 2014 Dec 22;31(6):722–33.
- 777 9. Olivieri F, Prattichizzo F, Grillari J, Balistreri CR. Cellular Senescence and Inflammaging  
778 in Age-Related Diseases. *Mediators Inflamm.* 2018 Apr 17;2018:e9076485.
- 779 10. Davalos AR, Coppe JP, Campisi J, Desprez PY. Senescent cells as a source of  
780 inflammatory factors for tumor progression. *Cancer Metastasis Rev.* 2010  
781 Jun;29(2):273–83.
- 782 11. Krtolica A, Parrinello S, Lockett S, Desprez PY, Campisi J. Senescent fibroblasts  
783 promote epithelial cell growth and tumorigenesis: a link between cancer and aging. *Proc*  
784 *Natl Acad Sci U S A.* 2001 Oct 9;98(21):12072–7.
- 785 12. Parrinello S, Coppe JP, Krtolica A, Campisi J. Stromal-epithelial interactions in aging  
786 and cancer: senescent fibroblasts alter epithelial cell differentiation. *J Cell Sci.* 2005 Feb  
787 1;118(Pt 3):485–96.
- 788 13. Kang C. Senolytics and Senostatics: A Two-Pronged Approach to Target Cellular  
789 Senescence for Delaying Aging and Age-Related Diseases. *Mol Cells.* 2019  
790 Dec;42(12):821–7.
- 791 14. Kim EC, Kim JR. Senotherapeutics: emerging strategy for healthy aging and age-related  
792 disease. *BMB Rep.* 2019 Jan;52(1):47–55.

- 793 15. Campisi J. Aging, cellular senescence, and cancer. *Annu Rev Physiol.* 2013;75:685–  
794 705.
- 795 16. Salotti J, Johnson PF. Regulation of senescence and the SASP by the transcription  
796 factor C/EBP $\beta$ . *Exp Gerontol.* 2019 Dec;128:110752.
- 797 17. Chan M, Yuan H, Soifer I, Maile TM, Wang RY, Ireland A, et al. Novel insights from a  
798 multiomics dissection of the Hayflick limit. *eLife* [Internet]. 2022 Feb 1 [cited 2022 Mar  
799 10];11. Available from: <https://doi.org/10.7554/eLife.70283>
- 800 18. Wang Y, Xu Q, Sack L, Kang C, Elledge SJ. A gain-of-function senescence bypass  
801 screen identifies the homeobox transcription factor DLX2 as a regulator of ATM–p53  
802 signaling. *Genes Dev.* 2016 Feb 1;30(3):293–306.
- 803 19. Xie Q, Peng S, Tao L, Ruan H, Yang Y, Li TM, et al. E2F Transcription Factor 1  
804 Regulates Cellular and Organismal Senescence by Inhibiting Forkhead Box O  
805 Transcription Factors. *J Biol Chem.* 2014 Dec 5;289(49):34205–13.
- 806 20. Han R, Li L, Ugalde AP, Tal A, Manber Z, Barbera EP, et al. Functional CRISPR screen  
807 identifies AP1-associated enhancer regulating FOXF1 to modulate oncogene-induced  
808 senescence. *Genome Biol.* 2018 Aug 17;19(1):118.
- 809 21. Martínez-Zamudio RI, Roux PF, de Freitas JANLF, Robinson L, Doré G, Sun B, et al.  
810 AP-1 imprints a reversible transcriptional programme of senescent cells. *Nat Cell Biol.*  
811 2020 Jul;22(7):842–55.
- 812 22. Brückmann NH, Bennedsen SN, Duijff PHG, Terp MG, Thomassen M, Larsen M, et al. A  
813 functional genetic screen identifies the Mediator complex as essential for SSX2-induced  
814 senescence. *Cell Death Dis.* 2019 Nov 6;10(11):1–12.
- 815 23. Tyler EJ, Gutierrez Del Arroyo A, Hughes BK, Wallis R, Garbe JC, Stampfer MR, et al.  
816 Early growth response 2 (EGR2) is a novel regulator of the senescence programme.  
817 *Aging Cell.* 2021 Mar;20(3):e13318.
- 818 24. Zhang C, Zhang X, Huang L, Guan Y, Huang X, Tian XL, et al. ATF3 drives senescence  
819 by reconstructing accessible chromatin profiles. *Aging Cell.* 2021 Mar;20(3):e13315.
- 820 25. Khan M, Gasser S. Generating Primary Fibroblast Cultures from Mouse Ear and Tail  
821 Tissues. *J Vis Exp JoVE* [Internet]. 2016 [cited 2022 Mar 23];(107). Available from:  
822 <https://www.ncbi.nlm.nih.gov/pmc/articles/PMC4781275/>
- 823 26. Casella G, Munk R, Kim KM, Piao Y, De S, Abdelmohsen K, et al. Transcriptome  
824 signature of cellular senescence. *Nucleic Acids Res.* 2019 Aug 22;47(14):7294–305.
- 825 27. Zhao H, Darzynkiewicz Z. Biomarkers of Cell Senescence Assessed by Imaging  
826 Cytometry. *Methods Mol Biol Clifton NJ.* 2013;965:83–92.
- 827 28. Danecek P, Bonfield JK, Liddle J, Marshall J, Ohan V, Pollard MO, et al. Twelve years of  
828 SAMtools and BCFtools. *GigaScience.* 2021 Feb 16;10(2):giab008.



- 829 29. Langmead B, Salzberg SL. Fast gapped-read alignment with Bowtie 2. *Nat Methods*.  
830 2012 Apr;9(4):357–9.
- 831 30. Li H, Handsaker B, Wysoker A, Fennell T, Ruan J, Homer N, et al. The Sequence  
832 Alignment/Map format and SAMtools. *Bioinforma Oxf Engl*. 2009 Aug 15;25(16):2078–9.
- 833 31. Li H. A statistical framework for SNP calling, mutation discovery, association mapping  
834 and population genetical parameter estimation from sequencing data. *Bioinforma Oxf*  
835 *Engl*. 2011 Nov 1;27(21):2987–93.
- 836 32. Kim D, Pertea G, Trapnell C, Pimentel H, Kelley R, Salzberg SL. TopHat2: accurate  
837 alignment of transcriptomes in the presence of insertions, deletions and gene fusions.  
838 *Genome Biol*. 2013 Apr 25;14(4):R36.
- 839 33. Putri GH, Anders S, Pyl PT, Pimanda JE, Zanini F. Analysing high-throughput  
840 sequencing data in Python with HTSeq 2.0. *Bioinformatics*. 2022 Mar 21;btac166.
- 841 34. Ashburner M, Ball CA, Blake JA, Botstein D, Butler H, Cherry JM, et al. Gene Ontology:  
842 tool for the unification of biology. *Nat Genet*. 2000 May;25(1):25–9.
- 843 35. Gene Ontology Consortium. The Gene Ontology resource: enriching a GOld mine.  
844 *Nucleic Acids Res*. 2021 Jan 8;49(D1):D325–34.
- 845 36. F N, N B, Py D, J C, B S. Quantitative Proteomic Analysis of the Senescence-Associated  
846 Secretory Phenotype by Data-Independent Acquisition. *Curr Protoc [Internet]*. 2021 Feb  
847 [cited 2023 Jan 13];1(2). Available from: <https://pubmed.ncbi.nlm.nih.gov/33524224/>
- 848 37. Yevshin I, Sharipov R, Kolmykov S, Kondrakhin Y, Kolpakov F. GTRD: a database on  
849 gene transcription regulation-2019 update. *Nucleic Acids Res*. 2019 Jan 8;47(D1):D100–  
850 5.
- 851 38. Livak KJ, Schmittgen TD. Analysis of Relative Gene Expression Data Using Real-Time  
852 Quantitative PCR and the  $2^{-\Delta\Delta CT}$  Method. *Methods*. 2001 Dec 1;25(4):402–8.
- 853 39. Olive PL, Banáth JP. The comet assay: a method to measure DNA damage in individual  
854 cells. *Nat Protoc*. 2006;1(1):23–9.
- 855 40. Schneider CA, Rasband WS, Eliceiri KW. NIH Image to ImageJ: 25 years of image  
856 analysis. *Nat Methods*. 2012 Jul;9(7):671–5.
- 857 41. Roy S, Lagree S, Hou Z, Thomson JA, Stewart R, Gasch AP. Integrated Module and  
858 Gene-Specific Regulatory Inference Implicates Upstream Signaling Networks. *PLOS*  
859 *Comput Biol*. 2013 Oct 17;9(10):e1003252.
- 860 42. Rodier F, Coppé JP, Patil CK, Hoeijmakers WAM, Muñoz DP, Raza SR, et al. Persistent  
861 DNA damage signalling triggers senescence-associated inflammatory cytokine  
862 secretion. *Nat Cell Biol*. 2009 Aug;11(8):973–9.
- 863 43. Siddiqui MS, François M, Fenech MF, Leifert WR. Persistent  $\gamma$ H2AX: A promising  
864 molecular marker of DNA damage and aging. *Mutat Res Rev Mutat Res*. 2015  
865 Dec;766:1–19.

- 866 44. Dimri GP, Lee X, Basile G, Acosta M, Scott G, Roskelley C, et al. A biomarker that  
867 identifies senescent human cells in culture and in aging skin in vivo. *Proc Natl Acad Sci*  
868 *U S A*. 1995 Sep 26;92(20):9363–7.
- 869 45. Park JT, Lee YS, Cho KA, Park SC. Adjustment of the lysosomal-mitochondrial axis for  
870 control of cellular senescence. *Ageing Res Rev*. 2018 Nov;47:176–82.
- 871 46. Brunk UT, Terman A. Lipofuscin: mechanisms of age-related accumulation and influence  
872 on cell function. *Free Radic Biol Med*. 2002 Sep 1;33(5):611–9.
- 873 47. Pluquet O, Pourtier A, Abbadie C. The unfolded protein response and cellular  
874 senescence. A review in the theme: cellular mechanisms of endoplasmic reticulum  
875 stress signaling in health and disease. *Am J Physiol Cell Physiol*. 2015 Mar  
876 15;308(6):C415-425.
- 877 48. Kim EK, Moon S, Kim DK, Zhang X, Kim J. CXCL1 induces senescence of cancer-  
878 associated fibroblasts via autocrine loops in oral squamous cell carcinoma. *PLOS ONE*.  
879 2018 Jan 23;13(1):e0188847.
- 880 49. Coppé JP, Patil CK, Rodier F, Krtolica A, Beauséjour CM, Parrinello S, et al. A Human-  
881 Like Senescence-Associated Secretory Phenotype Is Conserved in Mouse Cells  
882 Dependent on Physiological Oxygen. *PLOS ONE*. 2010 Feb 12;5(2):e9188.
- 883 50. Coppé JP, Desprez PY, Krtolica A, Campisi J. The senescence-associated secretory  
884 phenotype: the dark side of tumor suppression. *Annu Rev Pathol*. 2010;5:99–118.
- 885 51. Levi N, Papismadov N, Solomonov I, Sagi I, Krizhanovsky V. The ECM path of  
886 senescence in aging: components and modifiers. *FEBS J*. 2020 Jul;287(13):2636–46.
- 887 52. Sun W, Hu Y. eQTL Mapping Using RNA-seq Data. *Stat Biosci*. 2013 May 1;5(1):198–  
888 219.
- 889 53. Wittkopp PJ, Haerum BK, Clark AG. Evolutionary changes in cis and trans gene  
890 regulation. *Nature*. 2004 Jul 1;430(6995):85–8.
- 891 54. Wang Y, Sui Y, Lian A, Han X, Liu F, Zuo K, et al. PBX1 Attenuates Hair Follicle-Derived  
892 Mesenchymal Stem Cell Senescence and Apoptosis by Alleviating Reactive Oxygen  
893 Species-Mediated DNA Damage Instead of Enhancing DNA Damage Repair. *Front Cell*  
894 *Dev Biol*. 2021;9:739868.
- 895 55. Bandyopadhyay D, Okan NA, Bales E, Nascimento L, Cole PA, Medrano EE. Down-  
896 regulation of p300/CBP histone acetyltransferase activates a senescence checkpoint in  
897 human melanocytes. *Cancer Res*. 2002 Nov 1;62(21):6231–9.
- 898 56. Yang K, Wang F, Zhang H, Wang X, Chen L, Su X, et al. Target Inhibition of CBP  
899 Induced Cell Senescence in BCR-ABL- T315I Mutant Chronic Myeloid Leukemia. *Front*  
900 *Oncol [Internet]*. 2021 [cited 2022 Mar 10];10. Available from:  
901 <https://www.frontiersin.org/article/10.3389/fonc.2020.588641>

- 902 57. Qyang Y, Luo X, Lu T, Ismail PM, Krylov D, Vinson C, et al. Cell-type-dependent activity  
903 of the ubiquitous transcription factor USF in cellular proliferation and transcriptional  
904 activation. *Mol Cell Biol.* 1999 Feb;19(2):1508–17.
- 905 58. Pawar SA, Szentirmay MN, Hermeking H, Sawadogo M. Evidence for a cancer-specific  
906 switch at the CDK4 promoter with loss of control by both USF and c-Myc. *Oncogene.*  
907 2004 Aug 12;23(36):6125–35.
- 908 59. Chen N, Szentirmay MN, Pawar SA, Sirito M, Wang J, Wang Z, et al. Tumor-  
909 suppression function of transcription factor USF2 in prostate carcinogenesis. *Oncogene.*  
910 2006 Jan;25(4):579–87.
- 911 60. Aperlo C, Boulukos KE, Pognonec P. The basic region/helix-loop-helix/leucine repeat  
912 transcription factor USF interferes with Ras transformation. *Eur J Biochem.* 1996 Oct  
913 1;241(1):249–53.
- 914 61. Hu D, Tjon EC, Andersson KM, Molica GM, Pham MC, Healy B, et al. Aberrant  
915 expression of USF2 in refractory rheumatoid arthritis and its regulation of  
916 proinflammatory cytokines in Th17 cells. *Proc Natl Acad Sci.* 2020 Dec;117(48):30639–  
917 48.
- 918 62. Redon CE, Dickey JS, Bonner WM, Sedelnikova OA.  $\gamma$ -H2AX as a biomarker of DNA  
919 damage induced by ionizing radiation in human peripheral blood lymphocytes and  
920 artificial skin. *Adv Space Res Off J Comm Space Res COSPAR.* 2009;43(8):1171–8.
- 921 63. Fumagalli M, Rossiello F, Mondello C, d’Adda di Fagagna F. Stable Cellular Senescence  
922 Is Associated with Persistent DDR Activation. *PLoS ONE.* 2014 Oct 23;9(10):e110969.
- 923 64. Chen JH, Ozanne SE. Deep senescent human fibroblasts show diminished DNA  
924 damage foci but retain checkpoint capacity to oxidative stress. *FEBS Lett.* 2006 Dec  
925 11;580(28–29):6669–73.
- 926 65. Bakkenist CJ, Drissi R, Wu J, Kastan MB, Dome JS. Disappearance of the telomere  
927 dysfunction-induced stress response in fully senescent cells. *Cancer Res.* 2004 Jun  
928 1;64(11):3748–52.
- 929 66. Venkata Narayanan I, Paulsen MT, Bedi K, Berg N, Ljungman EA, Francia S, et al.  
930 Transcriptional and post-transcriptional regulation of the ionizing radiation response by  
931 ATM and p53. *Sci Rep.* 2017 Apr;7(1):43598.
- 932 67. Silva E, Ideker T. Transcriptional Responses to DNA Damage. *DNA Repair.* 2019  
933 Jul;79:40–9.
- 934 68. Huang RX, Zhou PK. DNA damage response signaling pathways and targets for  
935 radiotherapy sensitization in cancer. *Signal Transduct Target Ther.* 2020 May 1;5(1):1–  
936 27.
- 937 69. Nickoloff JA, Boss MK, Allen CP, LaRue SM. Translational research in radiation-induced  
938 DNA damage signaling and repair. *Transl Cancer Res.* 2017 Jul;6(Suppl 5):S875–91.

- 939 70. Podhorecka M, Skladanowski A, Bozko P. H2AX Phosphorylation: Its Role in DNA  
940 Damage Response and Cancer Therapy. *J Nucleic Acids*. 2010 Aug 3;2010:920161.
- 941 71. Kim YM, Byun HO, Jee BA, Cho H, Seo YH, Kim YS, et al. Implications of time-series  
942 gene expression profiles of replicative senescence. *Aging Cell*. 2013;12(4):622–34.
- 943 72. Santoro A, Spinelli CC, Martucciello S, Nori SL, Capunzo M, Puca AA, et al. Innate  
944 immunity and cellular senescence: The good and the bad in the developmental and  
945 aged brain. *J Leukoc Biol*. 2018;103(3):509–24.
- 946 73. Kale A, Sharma A, Stolzing A, Desprez PY, Campisi J. Role of immune cells in the  
947 removal of deleterious senescent cells. *Immun Ageing*. 2020 Dec;17(1):16.
- 948 74. Basisty N, Kale A, Jeon OH, Kuehnemann C, Payne T, Rao C, et al. A proteomic atlas of  
949 senescence-associated secretomes for aging biomarker development. *PLOS Biol*. 2020  
950 Jan 16;18(1):e3000599.
- 951 75. Purcell M, Kruger A, Tainsky MA. Gene expression profiling of replicative and induced  
952 senescence. *Cell Cycle Georget Tex*. 2014;13(24):3927–37.
- 953 76. Villarroel CA, Bastías M, Canessa P, Cubillos FA. Uncovering Divergence in Gene  
954 Expression Regulation in the Adaptation of Yeast to Nitrogen Scarcity. *mSystems*. 2021  
955 Aug 31;6(4):e0046621.
- 956 77. Veyrieras JB, Kudravalli S, Kim SY, Dermitzakis ET, Gilad Y, Stephens M, et al. High-  
957 Resolution Mapping of Expression-QTLs Yields Insight into Human Gene Regulation.  
958 *PLOS Genet*. 2008 Oct 10;4(10):e1000214.
- 959 78. Vierbuchen T, Ling E, Cowley CJ, Couch CH, Wang X, Harmin DA, et al. AP-1  
960 Transcription Factors and the BAF Complex Mediate Signal-Dependent Enhancer  
961 Selection. *Mol Cell*. 2017 Dec 21;68(6):1067-1082.e12.
- 962 79. Heinz S, Romanoski CE, Benner C, Allison KA, Kaikkonen MU, Orozco LD, et al. Effect  
963 of natural genetic variation on enhancer selection and function. *Nature*. 2013  
964 Nov;503(7477):487–92.
- 965 80. Yang MG, Ling E, Cowley CJ, Greenberg ME, Vierbuchen T. Characterization of  
966 sequence determinants of enhancer function using natural genetic variation. Parker SC,  
967 editor. *eLife*. 2022 Aug 31;11:e76500.
- 968 81. Sato AYS, Antonioli E, Tambellini R, Campos AH. ID1 inhibits USF2 and blocks TGF- $\beta$ -  
969 induced apoptosis in mesangial cells. *Am J Physiol Renal Physiol*. 2011  
970 Dec;301(6):F1260-1269.
- 971 82. Chi TF, Khoder-Agha F, Mennerich D, Kellokumpu S, Miinalainen Ii, Kietzmann T, et al.  
972 Loss of USF2 promotes proliferation, migration and mitophagy in a redox-dependent  
973 manner. *Redox Biol*. 2020 Oct 7;37:101750.
- 974 83. Vicencio JM, Galluzzi L, Tajeddine N, Ortiz C, Criollo A, Tasmir E, et al. Senescence,  
975 apoptosis or autophagy? When a damaged cell must decide its path--a mini-review.  
976 *Gerontology*. 2008;54(2):92–9.

- 977 84. Childs BG, Baker DJ, Kirkland JL, Campisi J, van Deursen JM. Senescence and  
978 apoptosis: dueling or complementary cell fates? *EMBO Rep.* 2014 Nov;15(11):1139–53.
- 979 85. Zhang X, Li J, Sejas DP, Pang Q. The ATM/p53/p21 pathway influences cell fate  
980 decision between apoptosis and senescence in reoxygenated hematopoietic progenitor  
981 cells. *J Biol Chem.* 2005 May 20;280(20):19635–40.
- 982 86. Hsu CH, Altschuler SJ, Wu LF. Patterns of Early p21 Dynamics Determine Proliferation-  
983 Senescence Cell Fate after Chemotherapy. *Cell.* 2019 Jul 11;178(2):361-373.e12.
- 984 87. Panneer Selvam S, Roth BM, Nganga R, Kim J, Cooley MA, Helke K, et al. Balance  
985 between senescence and apoptosis is regulated by telomere damage-induced  
986 association between p16 and caspase-3. *J Biol Chem.* 2018 Jun 22;293(25):9784–800.
- 987 88. Lee S, Schmitt CA. The dynamic nature of senescence in cancer. *Nat Cell Biol.* 2019  
988 Jan;21(1):94–101.
- 989 89. Beauséjour CM, Krtolica A, Galimi F, Narita M, Lowe SW, Yaswen P, et al. Reversal of  
990 human cellular senescence: roles of the p53 and p16 pathways. *EMBO J.* 2003 Aug  
991 15;22(16):4212–22.
- 992 90. Baron Y, Corre S, Mouchet N, Vaulont S, Prince S, Galibert MD. USF-1 Is Critical for  
993 Maintaining Genome Integrity in Response to UV-Induced DNA Photolesions. *PLoS*  
994 *Genet.* 2012 Jan 26;8(1):e1002470.
- 995 91. Song X, Zhu M, Li H, Liu B, Yan Z, Wang W, et al. USF1 promotes the development of  
996 knee osteoarthritis by activating the NF- $\kappa$ B signaling pathway. *Exp Ther Med.* 2018 Oct  
997 1;16(4):3518–24.
- 998 92. Ruuth M, Soronen J, Kaiharju E, Merikanto K, Perttilä J, Metso J, et al. USF1 deficiency  
999 alleviates inflammation, enhances cholesterol efflux and prevents cholesterol  
1000 accumulation in macrophages. *Lipids Health Dis.* 2018 Dec 13;17:285.
- 1001 93. Corre S, Galibert MD. Upstream stimulating factors: highly versatile stress-responsive  
1002 transcription factors. *Pigment Cell Res.* 2005;18(5):337–48.
- 1003 94. Bouafia A, Corre S, Gilot D, Mouchet N, Prince S, Galibert MD. p53 Requires the Stress  
1004 Sensor USF1 to Direct Appropriate Cell Fate Decision. *PLoS Genet.* 2014 May  
1005 15;10(5):e1004309.
- 1006 95. Samarakoon R, Overstreet JM, Higgins SP, Higgins PJ. TGF- $\beta$ 1  $\rightarrow$  SMAD/p53/USF2  $\rightarrow$   
1007 PAI-1 transcriptional axis in ureteral obstruction-induced renal fibrosis. *Cell Tissue Res.*  
1008 2012 Jan;347(1):117–28.
- 1009 96. Dörr JR, Yu Y, Milanovic M, Beuster G, Zasada C, Däbritz JHM, et al. Synthetic lethal  
1010 metabolic targeting of cellular senescence in cancer therapy. *Nature.* 2013  
1011 Sep;501(7467):421–5.
- 1012 97. Kurz DJ, Decary S, Hong Y, Erusalimsky JD. Senescence-associated (beta)-  
1013 galactosidase reflects an increase in lysosomal mass during replicative ageing of human  
1014 endothelial cells. *J Cell Sci.* 2000 Oct;113 ( Pt 20):3613–22.

- 1015 98. Lee BY, Han JA, Im JS, Morrone A, Johung K, Goodwin EC, et al. Senescence-  
1016 associated beta-galactosidase is lysosomal beta-galactosidase. *Aging Cell*. 2006  
1017 Apr;5(2):187–95.
- 1018 99. Pinheiro I, Dejager L, Petta I, Vandevyver S, Puimège L, Mahieu T, et al. LPS resistance  
1019 of SPRET/Ei mice is mediated by Gilz, encoded by the Tsc22d3 gene on the X  
1020 chromosome. *EMBO Mol Med*. 2013 Mar;5(3):456–70.
- 1021 100. Vanlaere I, Vanderrijst A, Guénet JL, De Filette M, Libert C. Mx1 causes resistance  
1022 against influenza A viruses in the *Mus spretus*-derived inbred mouse strain SPRET/Ei.  
1023 *Cytokine*. 2008 Apr;42(1):62–70.
- 1024 101. Blanchet C, Jaubert J, Carniel E, Fayolle C, Milon G, Szatanik M, et al. *Mus spretus*  
1025 SEG/Pas mice resist virulent *Yersinia pestis*, under multigenic control. *Genes Immun*.  
1026 2011 Jan;12(1):23–30.
- 1027 102. Pérez del Villar L, Vicente B, Galindo-Villardón P, Castellanos A, Pérez-Losada J, Muro  
1028 A. *Schistosoma mansoni* experimental infection in *Mus spretus* (SPRET/EiJ strain) mice.  
1029 *Parasite*. 2013;20:27.
- 1030 103. Dejager L, Libert C, Montagutelli X. Thirty years of *Mus spretus*: a promising future.  
1031 *Trends Genet*. 2009 May 1;25(5):234–41.
- 1032 104. Zhao Y, Tyshkovskiy A, Muñoz-Espín D, Tian X, Serrano M, de Magalhaes JP, et al.  
1033 Naked mole rats can undergo developmental, oncogene-induced and DNA damage-  
1034 induced cellular senescence. *Proc Natl Acad Sci*. 2018 Feb 20;115(8):1801–6.
- 1035 105. Tian X, Firsanov D, Zhang Z, Cheng Y, Luo L, Tomblin G, et al. SIRT6 Is Responsible  
1036 for More Efficient DNA Double-Strand Break Repair in Long-Lived Species. *Cell*. 2019  
1037 Apr;177(3):622-638.e22.
- 1038 106. Itahana K, Campisi J, Dimri GP. Mechanisms of cellular senescence in human and  
1039 mouse cells. *Biogerontology*. 2004;5(1):1–10.
- 1040  
1041
